# Supplementary material for: Parametrization of nanoparticles: development of full-particle nanodescriptors
Source: Royal Society of Chemistry journal article supplement (doi:10.1039/c6nr04376c), 2016-01-01
Supplement: c6nr04376c2.xlsx [file c6nr04376c2.xlsx]

## Sheet: Sheet1
		Total number of atoms in nanoparticle.	Total number of atoms in core region of nanoparticle.	Total number of atoms in shell region of nanoparticle.	Total number of metal atoms in nanoparticle.	Total number of metal atoms in core region of nanoparticle.	Total number of metal atoms in shell region of nanoparticle.	Total number of oxygen atoms in nanoparticle.	Total number of oxygen atoms in core region of nanoparticle.	Total number of oxygen atoms in shell region of nanoparticle.	Average potential energy of all atoms in nanoparticle in electron volts.	Average potential energy of atoms in core region of nanoparticle in electron volts.	Average potential energy of atoms in shell region of nanoparticle in electron volts.	Average potential energy of metal atoms in nanoparticle in electron volts.	Average potential energy of metal atoms in core region of nanoparticle in electron volts.	Average potential energy of metal atoms in shell region of nanoparticle in electron volts.	Average potential energy of oxygen atoms in nanoparticle in electron volts.	Average potential energy of oxygen atoms in core region of nanoparticle in electron volts.	Average potential energy of oxygen atoms in shell region of nanoparticle in electron volts.	Average coordination number of all atoms in nanoparticle.	Average coordination number of atoms in core region of nanoparticle.	Average coordination number of atoms in shell region of nanoparticle.	Average coordination number of metal atoms in nanoparticle.	Average coordination number of metal atoms in core region of nanoparticle.	Average coordination number of metal atoms in shell region of nanoparticle.	Average coordination number of oxygen atoms in nanoparticle.	Average coordination number of oxygen atoms in core region of nanoparticle.	Average coordination number of oxygen atoms in shell region of nanoparticle in.	Diameter of the nanoparticle in Å.	Surface area of the nanoparticle in Å2.	Volume of the nanoparticle in Å3.	Lattice energy of nanoparticle in electron volts.	Difference of the lattice energies of nanoparticle and infinite crystal.	Lattice energy of nanoparticle divided by the diameter of nanoparticle.	Lattice energy of nanoparticle per unit surface area.	Lattice energy of nanoparticle per unit volume.
NP	r (nm)	D0000000101	D0000000102	D0000000103	D0000000104	D0000000105	D0000000106	D0000000107	D0000000108	D0000000109	D0000000201	D0000000202	D0000000203	D0000000204	D0000000205	D0000000206	D0000000207	D0000000208	D0000000209	D0000000301	D0000000302	D0000000303	D0000000304	D0000000305	D0000000306	D0000000307	D0000000308	D0000000309	D0000000401	D0000000402	D0000000403	D0000000404	D0000000405	D0000000406	D0000000407	D0000000408
Al2O3	2.5	3.88649	3.22063	3.78089	3.48855	2.82086	3.38346	3.66464	3	3.55871	-30.3763	-30.8513	-30.2456	-45.1498	-46.0421	-44.9055	-20.5273	-20.795	-20.4534	4.5226	4.79663	4.44717	5.66039	6	5.56741	3.76407	4	3.6989	50.2	3.89856	4.82111	-151.882	-9.08044	-3.02553	-0.0191844	-0.00229295
Al2O3	5	4.78939	4.49941	4.47702	4.39145	4.10202	4.07849	4.56754	4.2772	4.25556	-30.6623	-30.9067	-30.4049	-45.6599	-46.0421	-45.2564	-20.664	-20.795	-20.5262	4.66123	4.80101	4.51405	5.82805	6	5.64652	3.88336	4	3.76077	100.2	4.49889	5.7216	-153.311	-7.65079	-1.53005	-0.00486059	-0.000291053
Al2O3	7.5	5.31788	5.13139	4.86082	4.91994	4.73379	4.46225	5.09603	4.90932	4.63939	-30.7516	-30.9017	-30.4716	-45.82	-46.0421	-45.4048	-20.706	-20.795	-20.5402	4.70834	4.80062	4.53626	5.88535	6	5.67109	3.92366	4	3.78153	150.2	4.85049	6.24901	-153.758	-7.20422	-1.02369	-0.00216944	-8.6662e-05
Al2O3	10	5.69265	5.55525	5.12595	5.29471	5.15746	4.72762	5.4708	5.33331	4.90436	-30.7882	-30.8972	-30.4952	-45.8765	-46.0421	-45.4308	-20.7293	-20.795	-20.553	4.73155	4.80027	4.54691	5.91428	6	5.68365	3.94307	4	3.79022	200.2	5.10008	6.62339	-153.941	-7.0211	-0.768936	-0.00122258	-3.66407e-05
Al2O3	12.5	5.98341	5.8747	5.32866	5.58547	5.47673	4.93083	5.76156	5.65287	5.10673	-30.8033	-30.8931	-30.4874	-45.8944	-46.0421	-45.3754	-20.7425	-20.795	-20.5579	4.74482	4.79994	4.55102	5.93135	6	5.69008	3.9538	4	3.79133	250.2	5.29372	6.91386	-154.016	-6.9456	-0.615573	-0.000783146	-1.87805e-05
Al2O3	15	6.22087	6.13093	5.49286	5.82293	5.73292	5.09523	5.99902	5.90913	5.27081	-30.8235	-30.8922	-30.5249	-45.93	-46.0421	-45.4429	-20.7526	-20.795	-20.568	4.75409	4.79987	4.55513	5.94266	6	5.6937	3.96171	4	3.79519	300.2	5.45197	7.15123	-154.118	-6.84445	-0.513383	-0.000544354	-1.08798e-05
Al2O3	17.5	6.42177	6.34513	5.6307	6.02383	5.9472	5.23269	6.19992	6.12327	5.4089	-30.8371	-30.8942	-30.5413	-45.9461	-46.0421	-45.4482	-20.7645	-20.795	-20.6061	4.76073	4.80003	4.55716	5.95066	6	5.69497	3.96745	4	3.79884	350.2	5.58578	7.35195	-154.185	-6.77659	-0.440278	-0.000400185	-6.8564e-06
Al2O3	20	6.59575	6.52888	5.75018	6.19781	6.13097	5.35207	6.3739	6.30701	5.52844	-30.8456	-30.8945	-30.5517	-45.9581	-46.0421	-45.4534	-20.7705	-20.795	-20.6233	4.76567	4.80005	4.55909	5.9568	6	5.69716	3.97157	4	3.80086	400.2	5.7017	7.52583	-154.228	-6.73421	-0.385377	-0.00030652	-4.5955e-06
Al2O3	22.5	6.74916	6.68992	5.85474	6.35122	6.29197	5.45685	6.52731	6.46808	5.63285	-30.8469	-30.8937	-30.527	-45.9673	-46.0421	-45.4557	-20.7667	-20.795	-20.5725	4.76942	4.79999	4.56028	5.96179	6	5.70038	3.97451	4	3.80006	450.2	5.80396	7.67922	-154.235	-6.72745	-0.342591	-0.000242226	-3.22825e-06
Al2O3	25	6.88643	6.83325	5.94806	6.48849	6.43533	5.55	6.66458	6.61139	5.7263	-30.8514	-30.8942	-30.5229	-45.9745	-46.0421	-45.455	-20.7694	-20.795	-20.5729	4.77244	4.80003	4.56062	5.96558	6	5.70124	3.97701	4	3.80057	500.2	5.89544	7.81643	-154.257	-6.70486	-0.308391	-0.000196249	-2.35405e-06
Al2O3	27.5	7.01062	7.04752	6.05459	6.61272	6.65002	5.65659	6.78882	6.8254	5.83279	-30.8539	-30.8939	-30.5157	-45.9851	-46.0421	-45.4588	-20.7705	-20.795	-20.5561	4.77678	4.80001	4.56218	5.97114	6	5.7021	3.98054	4	3.80118	550.2	5.97633	7.93986	-154.827	-6.13469	-0.259548	-0.000138061	-4.93737e-07
Al2O3	30	7.12398	7.18151	6.13594	6.72608	6.78405	5.73794	6.90218	6.95936	5.91414	-30.8568	-30.8938	-30.5077	-45.9946	-46.0421	-45.461	-20.7716	-20.795	-20.541	4.78067	4.8	4.56333	5.97612	6	5.70296	3.9837	4	3.80162	600.2	6.05174	8.05306	-155.015	-5.94664	-0.215703	-8.29259e-05	-8.73518e-07
Bi2O3	2.5	3.60369	2.93551	3.49872	3.20575	2.53782	3.10072	3.38184	2.71349	3.27692	-16.993	-17.328	-16.9014	-30.122	-30.8908	-29.9117	-8.24034	-8.27739	-8.23022	5.19153	5.58817	5.0831	4.63761	5	4.53846	5.56081	5.98066	5.44609	50.2	3.89856	4.82111	-84.9651	-2.1718	-1.69253	-0.0107321	-0.00128272
Bi2O3	5	4.50571	4.21519	4.1939	4.10775	3.81704	3.79616	4.28387	3.99348	3.97192	-17.2276	-17.3805	-17.067	-30.6449	-30.9031	-30.374	-8.28313	-8.37268	-8.18901	5.39989	5.60214	5.18748	4.82108	5	4.63335	5.78575	6.00325	5.55718	100.2	4.49889	5.7216	-86.1378	-0.999041	-0.859659	-0.00273092	-0.000163528
Bi2O3	7.5	5.03375	4.847	4.57717	4.63581	4.44951	4.1784	4.8119	4.62486	4.35587	-17.27	-17.3937	-17.0399	-30.6859	-30.8961	-30.2934	-8.32615	-8.37667	-8.23228	5.46318	5.60249	5.20385	4.87835	5	4.65126	5.85306	6.00484	5.57108	150.2	4.85049	6.24901	-86.3502	-0.786709	-0.574901	-0.00121835	-4.86693e-05
Bi2O3	10	5.40882	5.27148	4.84198	5.01088	4.87355	4.44401	5.18697	5.04962	4.62015	-17.3107	-17.3727	-17.1439	-30.7275	-30.897	-30.272	-8.36611	-8.35622	-8.39269	5.49902	5.59891	5.23048	4.91004	5	4.66818	5.89167	5.9982	5.60531	200.2	5.10008	6.62339	-86.5535	-0.583357	-0.432335	-0.000687395	-2.06013e-05
Bi2O3	12.5	5.69952	5.59089	5.04452	5.30158	5.19295	4.64657	5.47767	5.36904	4.82267	-17.2371	-17.3753	-16.7508	-30.6069	-30.8976	-29.5842	-8.32386	-8.36036	-8.19544	5.51857	5.59958	5.23351	4.92795	5	4.67444	5.91231	5.9993	5.60622	250.2	5.29372	6.91386	-86.1854	-0.951482	-0.344466	-0.000438237	-1.05093e-05
Bi2O3	15	5.93701	5.84704	5.20912	5.53907	5.4491	4.81117	5.71516	5.62519	4.98727	-17.3062	-17.3767	-16.9996	-30.7764	-30.8974	-30.251	-8.32601	-8.36295	-8.16556	5.53246	5.6001	5.23863	4.93948	5	4.67655	5.92779	6.00017	5.61334	300.2	5.45197	7.15123	-86.5309	-0.60596	-0.288244	-0.000305633	-6.10858e-06
Bi2O3	17.5	6.13784	6.06112	5.34715	5.7399	5.66318	4.94923	5.91599	5.83928	5.12528	-17.2479	-17.3765	-16.5826	-30.6514	-30.8974	-29.3781	-8.31234	-8.36274	-8.05145	5.54186	5.60005	5.24069	4.94877	5	4.68361	5.93725	6.00007	5.61213	350.2	5.58578	7.35195	-86.2397	-0.897132	-0.246259	-0.000223834	-3.83496e-06
Bi2O3	20	6.3118	6.24489	5.46648	5.91386	5.84697	5.06839	6.08995	6.02302	5.24472	-17.3227	-17.3764	-16.9999	-30.804	-30.8973	-30.2433	-8.33512	-8.36165	-8.17588	5.54882	5.59987	5.24223	4.95447	5	4.68093	5.94505	5.99982	5.61622	400.2	5.7017	7.52583	-86.6133	-0.52354	-0.216425	-0.00017214	-2.5808e-06
Bi2O3	22.5	6.46526	6.406	5.57094	6.06732	6.00801	5.17338	6.24341	6.18419	5.34884	-17.3202	-17.3749	-16.9454	-30.7914	-30.8971	-30.0691	-8.33932	-8.36207	-8.18355	5.55479	5.60003	5.24534	4.95983	5	4.68534	5.95143	5.99996	5.61921	450.2	5.80396	7.67922	-86.6008	-0.536069	-0.192361	-0.000136007	-1.81262e-06
Bi2O3	25	6.60234	6.54932	5.66282	6.20456	6.15132	5.26673	6.38067	6.3275	5.44221	-17.3416	-17.3748	-16.9456	-30.8052	-30.8971	-30.0653	-8.3559	-8.36142	-8.18871	5.56297	5.59991	5.24714	4.96733	5	4.68754	5.96006	5.99985	5.62294	500.2	5.89505	7.81585	-86.708	-0.428862	-0.173347	-0.000110411	-1.32499e-06
Bi2O3	27.5	6.72648	6.67843	5.74663	6.32874	6.28041	5.35121	6.50484	6.45663	5.52633	-17.3599	-17.3742	-16.9711	-30.825	-30.897	-30.0972	-8.36939	-8.36105	-8.20656	5.57036	5.59987	5.2493	4.974	5	4.68991	5.96793	5.99979	5.62648	550.2	5.97771	7.93984	-86.7993	-67.8868	-0.15776	-9.13713e-05	-9.9696e-07
Bi2O3	30	6.83982	6.79589	5.82293	6.4421	6.39786	5.42821	6.6182	6.57411	5.60296	-17.3781	-17.3737	-16.9965	-30.8447	-30.8969	-30.1292	-8.38288	-8.36068	-8.2244	5.57775	5.59983	5.25147	4.98068	5	4.69228	5.9758	5.99974	5.63002	600.2	6.05317	8.05303	-86.8906	-67.7954	-0.144769	-7.68782e-05	-7.69022e-07
CeO2	2.5	3.69827	3.01745	3.59671	3.22115	2.56703	3.11227	3.52218	2.82737	3.42423	-34.2064	-36.3937	-33.6301	-68.6613	-71.2945	-67.911	-16.979	-17.2294	-16.9156	8.61739	9.29107	8.43989	7.45012	8	7.29344	9.20102	10	8.99887	50.2	3.89856	4.82111	-102.619	-2.884	-2.04421	-0.012962	-0.00154924
CeO2	5	4.59677	4.3061	4.28513	4.11965	3.83372	3.80298	4.42068	4.12762	4.11153	-34.9337	-35.4488	-34.3931	-70.5629	-71.2945	-69.7777	-17.1191	-17.2294	-17.0046	8.97874	9.32602	8.61428	7.71371	8	7.40642	9.61126	10	9.20784	100.2	4.49889	5.7216	-104.801	-0.702226	-1.04592	-0.00332262	-0.000198959
CeO2	7.5	5.1263	4.93924	4.67031	4.64918	4.46085	4.19554	4.95021	4.76379	4.49304	-35.1311	-35.1984	-35.0059	-70.9245	-71.2945	-70.2429	-17.2344	-17.2294	-17.2436	9.09781	9.33528	8.6567	7.81352	8	7.47001	9.73995	10	9.25488	150.2	4.85049	6.24901	-105.393	-0.360072	-0.701686	-0.00148704	-5.94024e-05
CeO2	10	5.50202	5.36442	4.93586	5.0249	4.88841	4.45574	5.32593	5.18777	4.76127	-35.1562	-35.2973	-34.7777	-71.0337	-71.2945	-70.3272	-17.2175	-17.2294	-17.186	9.15744	9.33162	8.69017	7.85953	8	7.47911	9.80639	10	9.28947	200.2	5.10008	6.62339	-105.469	-0.284531	-0.526817	-0.000837618	-2.51034e-05
CeO2	12.5	5.79224	5.6839	5.13622	5.31512	5.20702	4.65824	5.61615	5.50768	4.96056	-35.4694	-35.2612	-36.2045	-71.5436	-71.2945	-72.4246	-17.4324	-17.2294	-18.148	9.19316	9.33296	8.69976	7.88727	8	7.48842	9.8461	10	9.30363	250.2	5.29372	6.91386	-106.408	0.655067	-0.425293	-0.000541067	-1.29752e-05
CeO2	15	6.0297	5.93963	5.30224	5.55258	5.46242	4.82548	5.85361	5.76358	5.12596	-36.689	-35.2476	-42.9432	-73.3506	-71.2945	-82.2626	-18.3582	-17.2294	-23.2586	9.21602	9.33346	8.70642	7.9075	8	7.50654	9.87028	10	9.30713	300.2	5.45197	7.15123	-110.067	4.31367	-0.366645	-0.000388764	-7.77009e-06
CeO2	17.5	6.2306	6.15384	5.44012	5.75348	5.67654	4.96392	6.05451	5.97784	5.26357	-35.349	-35.2437	-35.8933	-71.3816	-71.2945	-71.8309	-17.3326	-17.2294	-17.8675	9.23321	9.33361	8.71387	7.91988	8	7.50646	9.88987	10	9.31949	350.2	5.58578	7.35195	-106.047	0.293627	-0.302818	-0.000275243	-4.71575e-06
CeO2	20	6.40452	6.33747	5.56002	5.9274	5.86026	5.08343	6.22843	6.16143	5.38366	-35.2132	-35.2474	-35.0083	-71.1839	-71.2945	-70.522	-17.2278	-17.2294	-17.2184	9.24579	9.33347	8.72057	7.92999	8	7.51124	9.90369	10	9.32636	400.2	5.7017	7.52583	-105.639	-0.113797	-0.263967	-0.000209953	-3.14772e-06
CeO2	22.5	6.55796	6.49886	5.66256	6.08084	6.02179	5.18513	6.38187	6.32275	5.48663	-35.1966	-35.253	-34.8099	-71.1694	-71.2945	-70.3106	-17.2102	-17.2294	-17.0788	9.25554	9.33326	8.72239	7.93763	8	7.50941	9.9145	10	9.32822	450.2	5.80396	7.67922	-105.59	-0.163419	-0.23454	-0.000165829	-2.21008e-06
CeO2	25	6.69532	6.64216	5.75682	6.2182	6.16498	5.2801	6.51923	6.46609	5.58053	-35.3159	-35.2489	-35.8305	-71.2417	-71.2945	-70.8368	-17.353	-17.2294	-18.3027	9.26257	9.33341	8.71852	7.94309	8	7.50647	9.92231	10	9.32539	500.2	5.89544	7.81643	-105.948	0.19443	-0.211811	-0.000134789	-1.61682e-06
CeO2	27.5	6.81943	6.77118	5.84126	6.34231	6.29401	5.36458	6.64334	6.59512	5.66495	-35.2109	-35.2489	-34.8871	-71.1995	-71.2945	-70.3913	-17.2166	-17.2294	-17.108	9.26971	9.33341	8.72757	7.94894	8	7.51493	9.93009	10	9.3348	550.2	5.97819	7.94056	-105.633	-0.120582	-0.19199	-0.000111073	-1.21126e-06
CeO2	30	6.93287	6.88859	5.91933	6.45575	6.41146	5.44232	6.75678	6.71251	5.74318	-35.3513	-35.2506	-36.2895	-71.405	-71.2945	-72.4334	-17.3244	-17.2294	-18.2104	9.27492	9.33335	8.73056	7.95347	8	7.5201	9.93565	10	9.33603	600.2	6.05374	8.05389	-106.054	0.300576	-0.176698	-9.37097e-05	-9.36785e-07
Cr2O3	2.5	3.83315	3.16256	3.72884	3.43521	2.75282	3.33405	3.6113	2.94841	3.50488	-30.2997	-30.6214	-30.2124	-44.6201	-45.566	-44.3721	-20.7528	-21.0959	-20.6575	4.51043	4.77854	4.43764	5.64464	6	5.55144	3.75428	4	3.68605	50.2	3.89856	4.82111	-151.499	-2.92123	-3.0179	-0.019136	-0.00228717
Cr2O3	5	4.73552	4.44504	4.42367	4.33758	4.04673	4.02612	4.51367	4.22344	4.20156	-30.6359	-30.8755	-30.3841	-45.1988	-45.566	-44.8138	-20.9272	-21.096	-20.7498	4.65258	4.79931	4.49845	5.8161	6	5.62326	3.87691	4	3.74745	100.2	4.49889	5.7216	-153.179	-1.24058	-1.52874	-0.0048564	-0.000290803
Cr2O3	7.5	5.26475	5.07777	4.8086	4.86681	4.67968	4.41095	5.0429	4.85603	4.58656	-30.7123	-30.8805	-30.3996	-45.296	-45.566	-44.7947	-20.9898	-21.096	-20.7924	4.70397	4.79972	4.52603	5.88128	6	5.66087	3.9191	4	3.76864	150.2	4.85049	6.24901	-153.561	-0.858454	-1.02238	-0.00216667	-8.65513e-05
Cr2O3	10	5.63898	5.50156	5.07233	5.24104	5.1037	4.67418	5.41713	5.27966	4.85062	-30.7608	-30.8857	-30.425	-45.376	-45.566	-44.865	-21.0173	-21.096	-20.806	4.72823	4.80014	4.53502	5.91068	6	5.67052	3.93994	4	3.77863	200.2	5.10008	6.62339	-153.804	-0.616095	-0.768251	-0.00122149	-3.6608e-05
Cr2O3	12.5	5.92985	5.82113	5.27512	5.53191	5.42311	4.87745	5.708	5.59934	5.05308	-30.7877	-30.8822	-30.4556	-45.4234	-45.566	-44.9225	-21.0306	-21.096	-20.8008	4.74288	4.79986	4.54257	5.92827	6	5.67628	3.95262	4	3.78596	250.2	5.29372	6.91386	-153.939	-0.481173	-0.615263	-0.00078275	-1.8771e-05
Cr2O3	15	6.16742	6.07736	5.43992	5.76948	5.67937	5.04221	5.94557	5.85555	5.21792	-30.8201	-30.8828	-30.548	-45.4445	-45.566	-44.9178	-21.0704	-21.096	-20.9596	4.75275	4.7999	4.54813	5.94011	6	5.68041	3.96117	4	3.7926	300.2	5.45197	7.15123	-154.1	-0.319513	-0.513326	-0.000544293	-1.08786e-05
Cr2O3	17.5	6.36821	6.29154	5.57728	5.97027	5.89363	5.1792	6.14636	6.06967	5.35553	-30.8156	-30.8846	-30.4581	-45.4594	-45.566	-44.9069	-21.0531	-21.096	-20.831	4.75944	4.80005	4.54908	5.94945	6	5.68756	3.96609	4	3.79051	350.2	5.58578	7.35195	-154.078	-0.341946	-0.439971	-0.000399906	-6.85162e-06
Cr2O3	20	6.5422	6.47534	5.69658	6.14426	6.07736	5.2989	6.32035	6.25352	5.47456	-30.8246	-30.883	-30.4736	-45.4775	-45.566	-44.9461	-21.056	-21.096	-20.8158	4.76454	4.79992	4.55192	5.95544	6	5.68786	3.9706	4	3.79388	400.2	5.7017	7.52583	-154.123	-0.296909	-0.385115	-0.000306312	-4.59238e-06
Cr2O3	22.5	6.69568	6.63643	5.80133	6.29774	6.23846	5.40356	6.47383	6.4146	5.57937	-30.8317	-30.8834	-30.478	-45.4873	-45.566	-44.9494	-21.0613	-21.096	-20.824	4.76823	4.79995	4.55119	5.9602	6	5.68807	3.97358	4	3.79278	450.2	5.80396	7.67922	-154.159	-0.261349	-0.342422	-0.000242107	-3.22665e-06
Cr2O3	25	6.83295	6.77976	5.89464	6.43501	6.38184	5.49655	6.6111	6.5579	5.67288	-30.8414	-30.8844	-30.5114	-45.4942	-45.566	-44.9431	-21.0729	-21.096	-20.8955	4.77147	4.80003	4.55224	5.9641	6	5.68842	3.97639	4	3.7952	500.2	5.89544	7.81643	-154.207	-0.212865	-0.308291	-0.000196185	-2.35328e-06
Cr2O3	27.5	6.9571	6.90886	5.9788	6.55916	6.51089	5.58113	6.73525	6.68703	5.75677	-30.8412	-30.8833	-30.4829	-45.5008	-45.566	-44.9458	-21.0681	-21.096	-20.831	4.77393	4.79994	4.55253	5.9674	6	5.69012	3.97828	4	3.79335	550.2	5.97819	7.94056	-154.206	-0.214024	-0.280272	-0.000162147	-1.76824e-06
Cr2O3	30	7.07051	7.02397	6.0775	6.67256	6.62608	5.67903	6.84867	6.8021	5.85589	-30.8476	-30.884	-30.5018	-45.5091	-45.566	-44.9443	-21.0765	-21.096	-20.8571	4.7774	4.8	4.55332	5.97173	6	5.6904	3.98118	4	3.79434	600.2	6.05337	8.05328	-154.256	-0.163453	-0.257008	-0.000136417	-1.36448e-06
Fe2O3	2.5	3.82086	3.15534	3.71517	3.42292	2.74351	3.32098	3.59901	2.9425	3.4908	-29.2305	-29.7303	-29.0927	-42.8618	-44.1379	-42.5241	-20.1429	-20.6187	-20.0083	4.50785	4.77483	4.4343	5.64048	6	5.54537	3.75277	4	3.68282	50.2	3.89856	4.82111	-146.152	2.28696	-2.9114	-0.0184607	-0.00220646
Fe2O3	5	4.72509	4.43406	4.41384	4.32715	4.03559	4.01645	4.50325	4.21256	4.19162	-29.6065	-30.015	-29.1785	-43.4638	-44.1379	-42.7594	-20.3682	-20.6187	-20.1054	4.65567	4.79903	4.50548	5.825	6	5.64211	3.87611	4	3.74611	100.2	4.49889	5.7216	-148.032	4.16693	-1.47737	-0.00469322	-0.000281031
Fe2O3	7.5	5.25256	5.06648	4.79477	4.85462	4.66848	4.39693	5.03071	4.84466	4.57285	-29.8105	-30.0252	-29.4091	-43.8301	-44.1379	-43.2549	-20.4641	-20.6187	-20.175	4.703	4.7999	4.52185	5.87875	6	5.65215	3.91916	4	3.76801	150.2	4.85049	6.24901	-149.052	5.18703	-0.99236	-0.00210305	-8.40099e-05
Fe2O3	10	5.62744	5.4901	5.06058	5.2295	5.0918	4.66361	5.40559	5.26849	4.83809	-29.8696	-30.0186	-29.4688	-43.9078	-44.1379	-43.2912	-20.5107	-20.6187	-20.2198	4.72803	4.79934	4.5363	5.91009	6	5.6691	3.93998	4	3.7783	200.2	5.10008	6.62339	-149.348	5.48243	-0.745993	-0.0011861	-3.55474e-05
Fe2O3	12.5	5.91815	5.80944	5.26339	5.52021	5.41132	4.86609	5.6963	5.58771	5.04112	-29.8868	-30.0225	-29.4096	-43.9293	-44.1379	-43.1974	-20.5251	-20.6187	-20.1954	4.7422	4.79967	4.54016	5.92851	6	5.67761	3.95134	4	3.78002	250.2	5.29372	6.91386	-149.434	5.56849	-0.597258	-0.000759844	-1.82217e-05
Fe2O3	15	6.15563	6.0656	5.42801	5.75769	5.66749	5.03079	5.93378	5.84386	5.20569	-29.9185	-30.0228	-29.466	-43.9836	-44.1379	-43.3153	-20.5418	-20.6187	-20.2077	4.75154	4.79969	4.54252	5.93961	6	5.67801	3.95949	4	3.78343	300.2	5.45197	7.15123	-149.593	5.72734	-0.49831	-0.000528371	-1.05604e-05
Fe2O3	17.5	6.35644	6.27976	5.56554	5.9585	5.88177	5.1679	6.13459	6.05795	5.3435	-29.9299	-30.0251	-29.4365	-43.9965	-44.1379	-43.2652	-20.5521	-20.6187	-20.2069	4.75846	4.79989	4.54389	5.94842	6	5.68152	3.96516	4	3.78461	350.2	5.58578	7.35195	-149.649	5.78396	-0.427325	-0.000388412	-6.65469e-06
Fe2O3	20	6.53047	6.4636	5.68489	6.13253	6.06569	5.28674	6.30862	6.24173	5.46319	-29.9408	-30.0271	-29.4222	-44.0117	-44.1379	-43.2535	-20.5602	-20.6187	-20.2087	4.7637	4.80006	4.54522	5.95501	6	5.68459	3.96949	4	3.78625	400.2	5.7017	7.52583	-149.704	5.83865	-0.374073	-0.000297529	-4.46071e-06
Fe2O3	22.5	6.68392	6.62465	5.78968	6.28598	6.22671	5.39177	6.46208	6.40281	5.56781	-29.9573	-30.0263	-29.4858	-44.0392	-44.1379	-43.3648	-20.5694	-20.6187	-20.2321	4.76786	4.79999	4.54809	5.9597	6	5.68413	3.97329	4	3.79063	450.2	5.80396	7.67922	-149.787	5.9213	-0.332711	-0.000235241	-3.13515e-06
Fe2O3	25	6.8212	6.76795	5.88331	6.42326	6.37001	5.48544	6.59935	6.54611	5.66142	-29.9604	-30.0262	-29.4556	-44.0413	-44.1379	-43.3009	-20.5731	-20.6187	-20.223	4.77107	4.79998	4.54936	5.96406	6	5.68852	3.97574	4	3.78972	500.2	5.89544	7.81643	-149.802	5.93639	-0.299484	-0.000190581	-2.28606e-06
Fe2O3	27.5	6.94535	6.89708	5.96736	6.54741	6.49912	5.56961	6.7235	6.67525	5.74538	-29.9694	-30.0259	-29.4888	-44.0566	-44.1379	-43.366	-20.5779	-20.6187	-20.2305	4.7737	4.79996	4.55036	5.96718	6	5.68813	3.97805	4	3.79129	550.2	5.97819	7.94056	-149.847	5.98154	-0.27235	-0.000157564	-1.71825e-06
Fe2O3	30	7.05875	7.01217	6.06605	6.6608	6.61426	5.66777	6.83689	6.79027	5.84451	-29.9811	-30.0263	-29.4992	-44.074	-44.1379	-43.3848	-20.5859	-20.6187	-20.2387	4.77831	4.79992	4.55243	5.9717	6	5.69092	3.98118	4	3.79303	600.2	6.05337	8.05328	-149.872	6.00665	-0.249703	-0.00013254	-1.32569e-06
Gd2O3	2.5	3.62242	2.95904	3.51614	3.22453	2.5682	3.11628	3.40054	2.73239	3.29557	-25.9585	-25.1905	-26.1715	-39.7046	-38.6327	-40.008	-16.7927	-15.9802	-17.0149	6.67271	7.18681	6.53016	5.58378	6	5.46595	7.39881	8	7.23443	50.2	3.89856	4.82111	-129.793	5.04371	-2.58551	-0.0163943	-0.00195948
Gd2O3	5	4.52169	4.23282	4.20815	4.12375	3.83347	3.81171	4.29983	4.01191	3.98529	-25.8722	-25.0173	-26.7771	-38.3011	-38.6461	-37.9384	-17.5861	-15.9806	-19.2931	6.91757	7.2026	6.61589	5.77266	6	5.53363	7.68087	8	7.34157	100.2	4.49889	5.7216	-129.361	4.61203	-1.29103	-0.00410127	-0.000245585
Gd2O3	7.5	5.04895	4.86082	4.59496	4.65102	4.46307	4.19667	4.8271	4.63885	4.37334	-24.8682	-25.0484	-24.5357	-38.3572	-38.6403	-37.8345	-15.8754	-15.9806	-15.6815	7.01933	7.19965	6.68674	5.85578	6	5.58946	7.79504	8	7.41731	150.2	4.85049	6.24901	-124.341	-0.408076	-0.827836	-0.00175438	-7.00819e-05
Gd2O3	10	5.42421	5.28656	4.85819	5.02627	4.88882	4.45972	5.20236	5.06459	4.63669	-24.9152	-25.0496	-24.5548	-38.3993	-38.643	-37.7448	-15.9258	-15.9806	-15.7792	7.06489	7.19964	6.70356	5.89399	6	5.60926	7.84549	8	7.43163	200.2	5.10008	6.62339	-124.576	-0.172847	-0.622259	-0.000989366	-2.96513e-05
Gd2O3	12.5	5.71474	5.60544	5.0621	5.3168	5.20706	4.66567	5.4929	5.38388	4.83925	-24.9461	-25.0358	-24.6325	-38.48	-38.6412	-37.9193	-15.9235	-15.9806	-15.7231	7.09091	7.2008	6.70694	5.91224	6	5.60697	7.87668	8	7.44452	250.2	5.29372	6.91386	-124.73	-0.0185985	-0.498523	-0.000634232	-1.52094e-05
Gd2O3	15	5.95213	5.86214	5.22435	5.55419	5.46428	4.82606	5.73028	5.64023	5.00274	-25.0858	-25.0472	-25.2535	-38.5097	-38.6428	-37.9311	-16.1365	-15.9806	-16.8131	7.1088	7.19985	6.71334	5.92695	6	5.60938	7.89669	8	7.44834	300.2	5.45197	7.15123	-125.429	0.680021	-0.417818	-0.000443024	-8.85457e-06
Gd2O3	17.5	6.15305	6.07611	5.36353	5.75511	5.67812	4.96585	5.9312	5.85429	5.14152	-24.9781	-25.0443	-24.6368	-38.5214	-38.6422	-37.8984	-15.9492	-15.9806	-15.7871	7.1231	7.20009	6.7259	5.9392	6	5.62577	7.91236	8	7.46004	350.2	5.58578	7.35195	-124.89	0.141432	-0.356626	-0.000324151	-5.5537e-06
Gd2O3	20	6.32686	6.2601	5.48067	5.92892	5.86212	5.08299	6.10502	6.03828	5.25865	-24.9857	-25.0445	-24.6318	-38.5363	-38.6426	-37.8969	-15.952	-15.9806	-15.7795	7.13252	7.20008	6.72598	5.9461	6	5.62199	7.92347	8	7.46271	400.2	5.7017	7.52583	-124.929	0.17949	-0.312165	-0.000248289	-3.72247e-06
Gd2O3	22.5	6.48032	6.42109	5.5858	6.08238	6.02308	5.18833	6.25847	6.19929	5.36364	-25.0288	-25.0439	-24.9252	-38.5478	-38.6424	-37.9012	-16.0161	-15.9806	-16.2591	7.13973	7.20013	6.72636	5.95177	6	5.62214	7.93169	8	7.46383	450.2	5.80396	7.67922	-125.144	0.394919	-0.277974	-0.000196539	-2.61936e-06
Gd2O3	25	6.61756	6.56436	5.67943	6.21962	6.16651	5.28075	6.39572	6.34244	5.45807	-27.1722	-25.0473	-43.475	-38.563	-38.6424	-37.9524	-19.5784	-15.9806	-47.1463	7.14582	7.19982	6.73152	5.95668	6	5.62371	7.93859	8	7.46799	500.2	5.89544	7.81643	-135.861	11.1119	-0.271613	-0.000172845	-2.07331e-06
Gd2O3	27.5	6.7417	6.69349	5.76311	6.34376	6.29557	5.36503	6.51985	6.47163	5.54136	-24.9982	-25.0458	-24.5933	-38.5651	-38.6426	-37.9051	-15.9536	-15.9806	-15.7237	7.15083	7.19997	6.73225	5.96066	6	5.62544	7.94428	8	7.46972	550.2	5.97819	7.94056	-124.991	0.242115	-0.227174	-0.000131428	-1.43324e-06
Gd2O3	30	6.85507	6.81099	5.83969	6.45713	6.41304	5.44188	6.63323	6.58915	5.61775	-25.0083	-25.0451	-24.6644	-38.5755	-38.6425	-37.9482	-15.9636	-15.9806	-15.804	7.15495	7.20003	6.73303	5.96422	6	5.6294	7.94877	8	7.46916	600.2	6.05374	8.05389	-125.042	0.292706	-0.208333	-0.000110487	-1.10451e-06
In2O3	2.5	3.70243	3.05843	3.59062	3.30449	2.66839	3.19033	3.48058	2.83123	3.37033	-27.4892	-28.4026	-27.2209	-40.7934	-42.166	-40.3807	-18.6197	-18.9428	-18.5263	4.47302	4.81469	4.37269	5.61706	6	5.50194	3.71032	4	3.6266	50.2	3.89856	4.82111	-137.446	-3.67508	-2.73797	-0.017361	-0.00207502
In2O3	5	4.60724	4.31467	4.29759	4.2093	3.91572	3.90069	4.38539	4.09349	4.07504	-28.0097	-28.2014	-27.8102	-41.7993	-42.1433	-41.4432	-18.8166	-18.9428	-18.6849	4.64457	4.79814	4.48483	5.80731	6	5.60784	3.8694	4	3.73313	100.2	4.49889	5.7216	-140.048	-1.07258	-1.39769	-0.0044401	-0.000265874
In2O3	7.5	5.13542	4.94924	4.67779	4.73748	4.55211	4.27834	4.91357	4.72686	4.45694	-28.0846	-28.2419	-27.7907	-41.928	-42.1475	-41.5156	-18.8557	-18.9428	-18.6936	4.69664	4.80148	4.50076	5.86738	6	5.61827	3.91615	4	3.76004	150.2	4.85049	6.24901	-140.423	-0.697883	-0.934907	-0.00198129	-7.91462e-05
In2O3	10	5.51012	5.37269	4.94349	5.11218	4.97505	4.54474	5.28827	5.15064	4.72219	-28.1173	-28.2307	-27.8126	-41.9871	-42.1462	-41.5586	-18.8707	-18.9428	-18.6772	4.72342	4.80056	4.51617	5.90205	6	5.63822	3.93766	4	3.77048	200.2	5.10008	6.62339	-140.586	-0.534653	-0.702229	-0.00111652	-3.3462e-05
In2O3	12.5	5.80096	5.69213	5.14665	5.40302	5.29421	4.74861	5.57911	5.47026	4.92487	-28.1467	-28.2248	-27.8723	-42.0379	-42.1463	-41.6572	-18.8859	-18.9428	-18.686	4.73775	4.80005	4.51898	5.92037	6	5.64067	3.94934	4	3.77148	250.2	5.29372	6.91386	-140.733	-0.38752	-0.562484	-0.000715604	-1.71608e-05
In2O3	15	6.03838	5.94855	5.30988	5.64044	5.55075	4.91135	5.81653	5.72661	5.08842	-28.157	-28.2271	-27.8517	-42.0403	-42.1464	-41.5775	-18.9015	-18.9428	-18.7218	4.74795	4.80025	4.52038	5.93449	6	5.64894	3.95693	4	3.7697	300.2	5.45197	7.15123	-140.785	-0.335963	-0.468971	-0.000497262	-9.93861e-06
In2O3	17.5	6.23941	6.16242	5.45015	5.84147	5.76432	5.05301	6.01756	5.94067	5.22777	-28.1947	-28.2208	-28.0601	-42.0609	-42.146	-41.6234	-18.9505	-18.9428	-18.9902	4.75559	4.79971	4.52811	5.94319	6	5.65096	3.96385	4	3.77724	350.2	5.58578	7.35195	-140.973	-0.147511	-0.402551	-0.000365894	-6.26888e-06
In2O3	20	6.41313	6.3463	5.56736	6.01519	5.94837	5.16935	6.19128	6.12444	5.34555	-28.1737	-28.2244	-27.8687	-42.0668	-42.1462	-41.5892	-18.9116	-18.9428	-18.7242	4.76084	4.80002	4.52535	5.95106	6	5.65682	3.96737	4	3.77125	400.2	5.7017	7.52583	-140.869	-0.252408	-0.351995	-0.000279969	-4.19744e-06
In2O3	22.5	6.56659	6.50732	5.67234	6.16865	6.10928	5.2751	6.34474	6.28554	5.45002	-28.3246	-28.2219	-29.027	-42.2542	-42.1461	-42.9922	-19.0382	-18.9428	-19.6916	4.76519	4.79981	4.52841	5.95671	6	5.66122	3.97084	4	3.77115	450.2	5.80396	7.67922	-141.623	0.502195	-0.314578	-0.00022242	-2.96428e-06
In2O3	25	6.70386	6.65066	5.76564	6.30592	6.2527	5.36787	6.48201	6.42883	5.54368	-28.1784	-28.2237	-27.8309	-42.0711	-42.1462	-41.4948	-18.9166	-18.9428	-18.7156	4.76853	4.79996	4.52735	5.9611	6	5.66269	3.97349	4	3.76996	500.2	5.89544	7.81643	-140.892	-0.228909	-0.281671	-0.000179246	-2.15009e-06
In2O3	27.5	6.82809	6.77974	5.85074	6.43015	6.38181	5.45279	6.60624	6.55789	5.6289	-28.1907	-28.2242	-27.9062	-42.0937	-42.1462	-41.6475	-18.922	-18.9428	-18.7457	4.77171	4.8	4.53142	5.9642	6	5.66018	3.97671	4	3.77895	550.2	5.97819	7.94056	-140.953	-0.167458	-0.256186	-0.000148212	-1.61628e-06
In2O3	30	6.94138	6.89722	5.92679	6.54344	6.49931	5.5285	6.71953	6.67534	5.70518	-28.1895	-28.225	-27.8578	-42.0915	-42.1463	-41.5795	-18.9215	-18.9428	-18.7224	4.77376	4.80007	4.528	5.96726	6	5.6611	3.9781	4	3.77361	600.2	6.05374	8.05389	-140.947	-0.173471	-0.234834	-0.000124542	-1.245e-06
Mn2O3	2.5	3.79982	3.13386	3.69425	3.40192	2.75051	3.29226	3.57795	2.902	3.47509	-32.3378	-30.5203	-32.838	-44.2671	-45.0728	-44.0356	-24.384	-20.2533	-25.4879	4.50642	4.82733	4.41812	5.60285	6	5.48878	3.77537	4	3.71534	50.2	3.89856	4.82111	-161.689	-1089.19	-3.2209	-0.0204232	-0.00244102
Mn2O3	5	4.70044	4.40954	4.38904	4.3025	4.01026	3.99251	4.4786	4.18859	4.16625	-29.9435	-30.1456	-29.7316	-44.6983	-45.0609	-44.3206	-20.107	-20.2533	-19.9529	4.65234	4.79752	4.50014	5.81603	6	5.62438	3.87655	4	3.74659	100.2	4.49889	5.7216	-149.718	-1.16548	-1.49419	-0.00474665	-0.000284231
Mn2O3	7.5	5.22894	5.04235	4.77208	4.831	4.64441	4.37414	5.00709	4.8205	4.55023	-30.0211	-30.177	-29.7307	-44.8114	-45.0629	-44.3428	-20.161	-20.2532	-19.9891	4.70251	4.8	4.52086	5.87867	6	5.6526	3.9184	4	3.76637	150.2	4.85049	6.24901	-150.106	-25.7774	-0.999372	-0.00211791	-8.46036e-05
Mn2O3	10	5.60401	5.46654	5.03752	5.20607	5.06872	4.63925	5.38216	5.24461	4.81589	-30.3129	-30.1794	-30.6715	-44.8842	-45.0616	-44.4075	-20.5987	-20.2532	-21.5258	4.72768	4.80023	4.53284	5.90761	6	5.65924	3.94105	4	3.78286	200.2	5.10008	6.62339	-151.565	-949.318	-0.757066	-0.0012037	-3.60751e-05
Mn2O3	12.5	5.89454	5.78594	5.23943	5.4966	5.38808	4.8412	5.67269	5.56403	5.01778	-30.0716	-30.1787	-29.6945	-44.8878	-45.0624	-44.273	-20.1941	-20.2532	-19.9863	4.74126	4.80015	4.53397	5.9277	6	5.67299	3.9503	4	3.77546	250.2	5.29372	6.91386	-150.358	-975.525	-0.600951	-0.000764543	-1.83344e-05
Mn2O3	15	6.13208	6.04217	5.40393	5.73414	5.64436	5.00541	5.91023	5.82023	5.18247	-30.1087	-30.1797	-29.8001	-44.9445	-45.0617	-44.4339	-20.2181	-20.2532	-20.0659	4.75109	4.80025	4.53741	5.93855	6	5.67098	3.95945	4	3.78337	300.2	5.45197	7.15123	-150.543	-1000.34	-0.501477	-0.000531729	-1.06275e-05
Mn2O3	17.5	6.3329	6.2562	5.5421	5.93496	5.85827	5.1441	6.11105	6.03434	5.32029	-30.1122	-30.1769	-29.777	-44.9599	-45.0618	-44.4323	-20.2137	-20.2532	-20.009	4.75796	4.80002	4.54018	5.9475	6	5.67565	3.96493	4	3.78336	350.2	5.58578	7.35195	-150.561	-1025.32	-0.429928	-0.000390778	-6.69522e-06
Mn2O3	20	6.50692	6.44003	5.66146	6.10898	6.04203	5.26388	6.28507	6.21822	5.43937	-30.1178	-30.1752	-29.7729	-44.967	-45.0617	-44.3991	-20.2183	-20.2532	-20.0085	4.7633	4.79989	4.54358	5.95436	6	5.68049	3.96927	4	3.78458	400.2	5.7017	7.52583	-150.589	-1050.29	-0.376284	-0.000299288	-4.48707e-06
Mn2O3	22.5	6.66036	6.60108	5.76618	6.26242	6.20314	5.36822	6.43851	6.37923	5.54435	-30.1258	-30.1767	-29.7775	-44.9839	-45.0617	-44.4516	-20.2203	-20.2532	-19.9957	4.7676	4.80001	4.54598	5.95923	6	5.68042	3.97317	4	3.78976	450.2	5.80396	7.67922	-150.629	-1075.25	-0.334582	-0.000236563	-3.15278e-06
Mn2O3	25	6.79759	6.7444	5.85933	6.39965	6.34644	5.46152	6.57574	6.52256	5.6374	-30.1302	-30.1762	-29.7772	-44.9874	-45.0616	-44.4181	-20.2254	-20.2532	-20.0118	4.77064	4.79997	4.54552	5.96343	6	5.68284	3.97544	4	3.78695	500.2	5.89544	7.81643	-150.651	-1100.23	-0.301181	-0.000191661	-2.29902e-06
Mn2O3	27.5	6.92177	6.8735	5.9437	6.52383	6.47558	5.54562	6.69992	6.65164	5.72194	-30.1361	-30.177	-29.788	-44.9977	-45.0617	-44.4532	-20.2283	-20.2532	-20.0165	4.77334	4.80003	4.54623	5.96668	6	5.68315	3.97777	4	3.7887	550.2	5.97819	7.94056	-150.68	-1125.2	-0.273865	-0.00015844	-1.72781e-06
Mn2O3	30	7.03516	6.99098	6.02071	6.63722	6.59306	5.62256	6.81331	6.76912	5.79899	-30.139	-30.1771	-29.7827	-45.0033	-45.0617	-44.4579	-20.2294	-20.2532	-20.007	4.77564	4.80004	4.54777	5.96939	6	5.68339	3.97981	4	3.79129	600.2	6.05374	8.05389	-150.695	-1150.19	-0.251074	-0.000133155	-1.3311e-06
Sb2O3	2.5	3.5832	2.92117	3.47654	3.18526	2.52634	3.07773	3.36135	2.69723	3.25527	-27.2239	-28.5018	-26.8681	-41.4552	-42.6235	-41.127	-17.7363	-18.974	-17.3939	2.2799	2.40288	2.24566	2.797	3	2.73997	1.93516	2	1.91722	50.2	3.89856	4.82111	-136.119	-6.04948	-2.71154	-0.0171934	-0.00205499
Sb2O3	5	4.48029	4.18983	4.16844	4.08235	3.79323	3.76908	4.25845	3.96708	3.94753	-27.996	-28.4631	-27.5053	-42.006	-42.6235	-41.3533	-18.656	-18.974	-18.3233	2.32019	2.40124	2.23504	2.89742	3	2.78897	1.93536	2	1.86775	100.2	4.49889	5.7216	-139.98	-2.18884	-1.39701	-0.00443793	-0.000265745
Sb2O3	7.5	5.01017	4.82235	4.5556	4.61223	4.42469	4.15715	4.78832	4.60032	4.33409	-28.1676	-28.4398	-27.6645	-42.1957	-42.6235	-41.4036	-18.8155	-18.974	-18.523	2.35096	2.40025	2.25986	2.94031	3	2.82981	1.95806	2	1.88064	150.2	4.85049	6.24901	-140.838	-1.331	-0.937669	-0.00198715	-7.938e-05
Sb2O3	10	5.38475	5.24704	4.81889	4.98681	4.84939	4.42015	5.1629	5.02499	4.59756	-28.2425	-28.4402	-27.7126	-42.3421	-42.6235	-41.5862	-18.8428	-18.974	-18.4916	2.3613	2.40027	2.25684	2.94958	3	2.81412	1.96911	2	1.88646	200.2	5.10008	6.62339	-141.213	-0.956365	-0.705357	-0.00112149	-3.36111e-05
Sb2O3	12.5	5.67558	5.56657	5.02189	5.27764	5.16873	4.62358	5.45373	5.34465	4.80029	-28.4345	-28.4361	-28.4288	-42.395	-42.6235	-41.5932	-19.1275	-18.974	-19.665	2.36835	2.4001	2.25707	2.95888	3	2.81459	1.97466	2	1.88592	250.2	5.29372	6.91386	-142.172	0.00346321	-0.568235	-0.000722921	-1.73362e-05
Sb2O3	15	5.91283	5.82268	5.18568	5.51489	5.42484	4.78732	5.69098	5.60077	4.96412	-28.3085	-28.4359	-27.7563	-42.4346	-42.6235	-41.6149	-18.8911	-18.974	-18.5322	2.37293	2.40009	2.25521	2.96601	3	2.81851	1.97755	2	1.88029	300.2	5.45197	7.15123	-141.543	-0.626294	-0.471494	-0.000499938	-9.99209e-06
Sb2O3	17.5	6.11356	6.03696	5.32227	5.71562	5.63886	4.92513	5.89171	5.81521	5.09989	-28.447	-28.4304	-28.5328	-42.4633	-42.6235	-41.6348	-19.1028	-18.974	-19.7715	2.37713	2.39986	2.25931	2.97122	3	2.82233	1.98107	2	1.88282	350.2	5.58578	7.35195	-142.235	0.0660677	-0.406154	-0.000369168	-6.32498e-06
Sb2O3	20	6.28769	6.22074	5.44257	5.88975	5.82275	5.04492	6.06584	5.99892	5.22054	-28.3372	-28.4328	-27.7639	-42.4741	-42.6235	-41.5784	-18.9126	-18.974	-18.5442	2.38007	2.39996	2.26073	2.9753	3	2.82723	1.98324	2	1.88266	400.2	5.7017	7.52583	-141.686	-0.482878	-0.354038	-0.000281594	-4.22179e-06
Sb2O3	22.5	6.44115	6.38184	5.54715	6.04321	5.98385	5.14955	6.2193	6.16002	5.32508	-28.3477	-28.4327	-27.7666	-42.4896	-42.6235	-41.5755	-18.9197	-18.974	-18.5487	2.38246	2.39995	2.26286	2.9783	3	2.83013	1.98523	2	1.88419	450.2	5.80396	7.67922	-141.738	-0.430524	-0.314834	-0.000222601	-2.96669e-06
Sb2O3	25	6.57833	6.52519	5.63963	6.18039	6.1272	5.24212	6.35648	6.30338	5.41749	-28.3599	-28.4325	-27.8021	-42.5112	-42.6235	-41.6498	-18.9258	-18.974	-18.5549	2.38431	2.39995	2.26415	2.98013	3	2.82765	1.98709	2	1.88786	500.2	5.89544	7.81643	-141.8	-0.36916	-0.283486	-0.000180401	-2.16394e-06
Sb2O3	27.5	6.70258	6.6542	5.7255	6.30464	6.2563	5.32718	6.48073	6.43232	5.50391	-28.3656	-28.4348	-27.7785	-42.5189	-42.6235	-41.6308	-18.93	-18.974	-18.5572	2.38555	2.40004	2.26259	2.98199	3	2.82905	1.98792	2	1.88549	550.2	5.97819	7.94056	-141.828	-0.341007	-0.257775	-0.000149132	-1.6263e-06
Sb2O3	30	6.81589	6.7717	5.80149	6.41795	6.37378	5.40344	6.59404	6.54985	5.57972	-28.372	-28.434	-27.7928	-42.5303	-42.6235	-41.6607	-18.9331	-18.974	-18.5517	2.3868	2.40001	2.26345	2.98346	3	2.829	1.98903	2	1.88658	600.2	6.05374	8.05389	-141.86	-0.30881	-0.236355	-0.000125348	-1.25307e-06
V2O3	2.5	3.82086	3.15351	3.71567	3.42292	2.74819	3.31973	3.59901	2.93651	3.49248	-28.5179	-28.9033	-28.4123	-42.6885	-43.481	-42.476	-19.0709	-19.4547	-18.9642	4.51601	4.78652	4.44188	5.63104	6	5.53209	3.77266	4	3.70946	50.2	3.89856	4.82111	-142.59	1.36529	-2.84043	-0.0180107	-0.00215267
V2O3	5	4.72346	4.43291	4.41169	4.32552	4.03535	4.01334	4.50161	4.2108	4.19011	-28.8288	-29.0737	-28.5717	-43.081	-43.481	-42.6602	-19.3274	-19.4547	-19.1938	4.65278	4.80071	4.49744	5.81749	6	5.62548	3.87631	4	3.74658	100.2	4.49889	5.7216	-144.144	2.91987	-1.43856	-0.00456995	-0.00027365
V2O3	7.5	5.25121	5.06476	4.79409	4.85327	4.667	4.39582	5.02936	4.8428	4.57246	-28.9229	-29.0692	-28.6501	-43.2285	-43.481	-42.7569	-19.3859	-19.4547	-19.2577	4.70351	4.80033	4.52295	5.87699	6	5.64732	3.92119	4	3.77433	150.2	4.85049	6.24901	-144.615	3.39038	-0.962814	-0.00204043	-8.15087e-05
V2O3	10	5.62593	5.48873	5.0587	5.22799	5.09091	4.66043	5.40408	5.2668	4.83707	-28.954	-29.0679	-28.6471	-43.2932	-43.481	-42.7871	-19.3945	-19.4547	-19.2324	4.72846	4.80023	4.53529	5.9098	6	5.66676	3.9409	4	3.78193	200.2	5.10008	6.62339	-144.77	3.54549	-0.723126	-0.00114974	-3.44578e-05
V2O3	12.5	5.91694	5.80805	5.26286	5.519	5.41027	4.86433	5.69509	5.58609	5.04141	-28.9892	-29.069	-28.7093	-43.3269	-43.481	-42.7849	-19.4308	-19.4547	-19.3469	4.74334	4.80031	4.54342	5.92718	6	5.6712	3.95411	4	3.79326	250.2	5.29372	6.91386	-144.946	3.72168	-0.57932	-0.000737024	-1.76744e-05
V2O3	15	6.15435	6.06428	5.42691	5.75641	5.66627	5.02928	5.9325	5.84247	5.20486	-29.0022	-29.0637	-28.7355	-43.3568	-43.481	-42.8185	-19.4324	-19.4547	-19.3358	4.75216	4.79987	4.54515	5.93922	6	5.67572	3.96079	4	3.79056	300.2	5.45197	7.15123	-145.011	3.78671	-0.483048	-0.000512188	-1.02369e-05
V2O3	17.5	6.35507	6.27839	5.56419	5.95713	5.88051	5.16592	6.13322	6.0565	5.34256	-28.9982	-29.0666	-28.6441	-43.3638	-43.481	-42.7562	-19.4212	-19.4547	-19.2478	4.75847	4.80012	4.54283	5.9484	6	5.68097	3.96519	4	3.78502	350.2	5.58578	7.35195	-144.991	3.76689	-0.414024	-0.000376322	-6.44755e-06
V2O3	20	6.52904	6.46219	5.68341	6.1311	6.06423	5.28558	6.3072	6.24035	5.4615	-29.0086	-29.0648	-28.6707	-43.3819	-43.481	-42.7867	-19.4264	-19.4547	-19.2562	4.76394	4.79997	4.54748	5.95514	6	5.68565	3.96981	4	3.78839	400.2	5.7017	7.52583	-145.043	3.81873	-0.362426	-0.000288266	-4.32182e-06
V2O3	22.5	6.68254	6.62329	5.7882	6.2846	6.22539	5.38997	6.46069	6.40141	5.56654	-29.017	-29.0662	-28.6806	-43.3984	-43.481	-42.833	-19.4293	-19.4547	-19.2561	4.76799	4.80008	4.54853	5.95961	6	5.68313	3.97358	4	3.79296	450.2	5.80396	7.67922	-145.085	3.86063	-0.322268	-0.000227857	-3.03674e-06
V2O3	25	6.81976	6.76659	5.88132	6.42182	6.36862	5.48356	6.59791	6.54475	5.65935	-29.0214	-29.0647	-28.6887	-43.4049	-43.481	-42.8208	-19.4323	-19.4547	-19.2607	4.77105	4.79996	4.54908	5.96384	6	5.68632	3.97585	4	3.79039	500.2	5.89544	7.81643	-145.107	3.88258	-0.290098	-0.000184608	-2.21441e-06
V2O3	27.5	6.94393	6.89567	5.96582	6.54599	6.4977	5.56807	6.72208	6.67383	5.74385	-29.0258	-29.0648	-28.6941	-43.4122	-43.481	-42.827	-19.4348	-19.4547	-19.2656	4.77373	4.79996	4.55059	5.96721	6	5.68835	3.97808	4	3.79156	550.2	5.97819	7.94056	-145.129	3.90458	-0.263775	-0.000152603	-1.66415e-06
V2O3	30	7.05721	7.01065	6.06431	6.65926	6.61273	5.66606	6.83536	6.78878	5.84271	-29.0345	-29.0643	-28.7111	-43.4237	-43.481	-42.844	-19.4378	-19.4547	-19.2678	4.77729	4.79995	4.55139	5.97156	6	5.69115	3.98034	4	3.79023	600.2	6.05337	8.05328	-145.151	3.92654	-0.241837	-0.000128365	-1.28393e-06
WO3	2.5	3.69548	3.03543	3.58827	3.09342	2.42975	2.98722	3.57054	2.91169	3.463	-51.6518	-51.9712	-51.5624	-154.538	-156.492	-153.997	-17.3565	-17.5153	-17.3119	2.83427	2.99171	2.79019	5.64435	6	5.54583	1.89758	2	1.8688	50.2	3.89856	4.82111	-206.607	-2.4295	-4.11568	-0.0260969	-0.00311915
WO3	5	4.59796	4.30662	4.28702	3.9959	3.70561	3.68386	4.47302	4.18133	4.16244	-52.0104	-52.3467	-51.6586	-155.517	-156.487	-154.498	-17.5082	-17.5213	-17.4945	2.91278	3.00242	2.819	5.82495	6	5.64092	1.94206	2	1.88154	100.2	4.49889	5.7216	-208.042	-0.99519	-2.07626	-0.00659576	-0.000394956
WO3	7.5	5.12586	4.93966	4.66828	4.5238	4.33756	4.06629	5.00093	4.81474	4.54332	-52.0799	-52.2596	-51.7441	-155.787	-156.486	-154.483	-17.5114	-17.5223	-17.4911	2.94145	2.9999	2.83226	5.88331	6	5.66538	1.96084	2	1.88769	150.2	4.85049	6.24901	-208.32	-0.717274	-1.38695	-0.00293928	-0.000117414
WO3	10	5.50079	5.36334	4.93421	4.89873	4.76124	4.33226	5.37585	5.23842	4.80923	-52.1353	-52.2593	-51.8019	-156.005	-156.486	-154.711	-17.5122	-17.5214	-17.4873	2.95688	2.9999	2.84131	5.9133	6	5.68047	1.97141	2	1.8946	200.2	5.10008	6.62339	-208.541	-0.495799	-1.04166	-0.0016562	-4.96365e-05
WO3	12.5	5.79148	5.68278	5.13673	5.18942	5.08063	4.53496	5.66655	5.55787	5.0117	-52.1472	-52.256	-51.765	-156.042	-156.486	-154.48	-17.5158	-17.5214	-17.4961	2.96482	2.99981	2.84183	5.92994	6	5.68381	1.97646	2	1.89365	250.2	5.29372	6.91386	-208.589	-0.447853	-0.833689	-0.00106064	-2.54349e-05
WO3	15	6.02902	5.93904	5.30119	5.42696	5.33689	4.6995	5.90408	5.81413	5.17612	-52.1767	-52.2559	-51.8329	-156.155	-156.486	-154.718	-17.5173	-17.5216	-17.4985	2.97097	2.9998	2.84573	5.94199	6	5.69028	1.98063	2	1.89645	300.2	5.45197	7.15123	-208.707	-0.329881	-0.695226	-0.000737167	-1.47335e-05
WO3	17.5	6.22986	6.15313	5.43924	5.6278	5.55108	4.83714	6.10492	6.02819	5.31431	-52.2368	-52.2633	-52.0994	-156.209	-156.486	-154.771	-17.5795	-17.5215	-17.8793	2.9754	3.00002	2.84804	5.95005	6	5.69151	1.98386	2	1.90033	350.2	5.58578	7.35195	-208.947	-0.0896799	-0.596651	-0.000542318	-9.29158e-06
WO3	20	6.40383	6.33699	5.55808	5.80177	5.73491	4.9561	6.27889	6.21205	5.43312	-52.1964	-52.2616	-51.804	-156.23	-156.486	-154.689	-17.5185	-17.5215	-17.5007	2.97817	2.99997	2.84715	5.95642	6	5.69458	1.98542	2	1.89778	400.2	5.7017	7.52583	-208.785	-0.251414	-0.521703	-0.00041495	-6.22115e-06
WO3	22.5	6.55724	6.49801	5.66269	5.95518	5.89597	5.06045	6.4323	6.37306	5.53782	-52.205	-52.2648	-51.7952	-156.264	-156.486	-154.745	-17.5185	-17.5215	-17.4978	2.98062	3.00006	2.84757	5.96127	6	5.69607	1.98707	2	1.8986	450.2	5.80396	7.67922	-208.82	-0.217015	-0.463838	-0.000327952	-4.37076e-06
WO3	25	6.69454	6.64132	5.7565	6.09248	6.03926	5.15443	6.5696	6.51638	5.63157	-52.2121	-52.2628	-51.8227	-156.291	-156.486	-154.789	-17.5192	-17.5215	-17.5014	2.98262	3	2.84927	5.96525	6	5.69869	1.98841	2	1.89949	500.2	5.89544	7.81643	-208.848	-0.188637	-0.417529	-0.000265701	-3.18714e-06
WO3	27.5	6.8187	6.77044	5.84056	6.21664	6.16839	5.23846	6.69376	6.6455	5.71563	-52.2334	-52.2631	-51.981	-156.311	-156.486	-154.817	-17.541	-17.5215	-17.7063	2.98426	3.00001	2.85024	5.9684	6	5.69946	1.98955	2	1.90062	550.2	5.97819	7.94056	-208.934	-0.103113	-0.379741	-0.000219694	-2.39579e-06
WO3	30	6.93209	6.88789	5.91781	6.33003	6.28582	5.31576	6.80715	6.76295	5.79287	-52.2202	-52.2627	-51.8233	-156.322	-156.486	-154.787	-17.5196	-17.5215	-17.5013	2.98552	3	2.85039	5.97107	6	5.70102	1.99034	2	1.90016	600.2	6.05374	8.05389	-208.881	-0.15623	-0.348018	-0.000184568	-1.84506e-06
Y2O3	2.5	3.63649	2.95904	3.53403	3.23855	2.5682	3.13418	3.41464	2.73239	3.31345	-29.2674	-27.2013	-29.8171	-43.1925	-40.6277	-43.8892	-19.984	-18.0018	-20.5041	4.47621	4.81319	4.38655	5.60566	6	5.49853	3.72325	4	3.65063	50.2	3.89856	4.82111	-146.337	11.1056	-2.91508	-0.018484	-0.00220924
Y2O3	5	4.54108	4.25022	4.22963	4.14314	3.85089	3.83315	4.31923	4.0293	4.00681	-26.8583	-27.0198	-26.6889	-40.3087	-40.6189	-39.9855	-17.8913	-18.0021	-17.7747	4.63585	4.79744	4.46641	5.79502	6	5.5815	3.86306	4	3.71884	100.2	4.49889	5.7216	-134.291	-0.93983	-1.34023	-0.00425758	-0.000254945
Y2O3	7.5	5.06911	4.88299	4.61138	4.67117	4.48583	4.21197	4.84726	4.66062	4.39051	-26.9165	-27.0624	-26.6439	-40.3712	-40.612	-39.9188	-17.9468	-18.0021	-17.8437	4.6901	4.80145	4.48199	5.86563	6	5.61318	3.90641	4	3.7321	150.2	4.85049	6.24901	-134.583	-0.648571	-0.896023	-0.00189889	-7.58544e-05
Y2O3	10	5.44384	5.30678	4.87625	5.0459	4.90901	4.47784	5.22199	5.08481	4.65472	-26.9475	-27.0495	-26.6725	-40.4542	-40.6116	-40.0294	-17.943	-18.0021	-17.7839	4.71685	4.80032	4.49193	5.89631	6	5.61647	3.93055	4	3.74358	200.2	5.10008	6.62339	-134.737	-0.493922	-0.673014	-0.00107006	-3.20699e-05
Y2O3	12.5	5.7348	5.62603	5.08031	5.33686	5.22808	4.6824	5.51296	5.40418	4.85843	-26.9808	-27.046	-26.7519	-40.5006	-40.6124	-40.108	-17.9676	-18.0021	-17.8466	4.73325	4.79998	4.49881	5.91688	6	5.6249	3.94417	4	3.74799	250.2	5.29372	6.91386	-134.904	-0.327095	-0.539185	-0.000685963	-1.645e-05
Y2O3	15	5.97221	5.88225	5.24428	5.57427	5.48417	4.84696	5.75036	5.6605	5.02202	-26.9887	-27.0435	-26.7508	-40.5126	-40.613	-40.0772	-17.9728	-18.0021	-17.8456	4.74459	4.79974	4.50495	5.93144	6	5.63405	3.95335	4	3.75044	300.2	5.45197	7.15123	-134.944	-0.287547	-0.449513	-0.00047663	-9.52625e-06
Y2O3	17.5	6.17305	6.09637	5.38214	5.77511	5.6984	4.98438	5.9512	5.87455	5.16018	-26.989	-27.0456	-26.696	-40.5194	-40.6126	-40.0372	-17.9687	-18.0021	-17.7957	4.75267	4.79994	4.50792	5.94112	6	5.63631	3.96038	4	3.75514	350.2	5.58578	7.35195	-134.945	-0.28632	-0.385337	-0.000350247	-6.0008e-06
Y2O3	20	6.34712	6.28024	5.50165	5.94918	5.88249	5.10257	6.12527	6.05827	5.28055	-27.0332	-27.0498	-26.9333	-40.5722	-40.6117	-40.3346	-18.0072	-18.0021	-18.0379	4.75846	4.80035	4.5069	5.94873	6	5.63984	3.96495	4	3.75488	400.2	5.7017	7.52583	-135.166	-0.0651807	-0.337746	-0.000268636	-4.02752e-06
Y2O3	22.5	6.50064	6.44134	5.60658	6.1027	6.0434	5.20866	6.27879	6.2195	5.38473	-27.1082	-27.0464	-27.5307	-40.5498	-40.6129	-40.1182	-18.1471	-18.0021	-19.1385	4.76364	4.8	4.5151	5.95387	6	5.63854	3.97015	4	3.76609	450.2	5.80396	7.67922	-135.541	0.309719	-0.301068	-0.000212868	-2.83697e-06
Y2O3	25	6.63783	6.5846	5.69983	6.23989	6.1866	5.30239	6.41598	6.3628	5.47765	-27.0075	-27.0449	-26.7207	-40.5514	-40.6126	-40.0824	-17.9783	-18.0021	-17.7959	4.76696	4.79988	4.51449	5.95866	6	5.64204	3.97249	4	3.76135	500.2	5.89544	7.81643	-135.038	-0.193482	-0.269968	-0.000171798	-2.06075e-06
Y2O3	27.5	6.76199	6.71369	5.78424	6.36405	6.31578	5.38604	6.54014	6.49182	5.56256	-27.035	-27.0469	-26.934	-40.582	-40.6125	-40.3228	-18.0036	-18.0021	-18.017	4.76978	4.80006	4.51241	5.96261	6	5.64456	3.97456	4	3.75839	550.2	5.97819	7.94056	-135.175	-0.0562011	-0.245683	-0.000142136	-1.55002e-06
Y2O3	30	6.87536	6.83115	5.86125	6.47742	6.43314	5.46392	6.65351	6.60934	5.63899	-27.0307	-27.0449	-26.8981	-40.5809	-40.6127	-40.2853	-17.9973	-18.0021	-17.9522	4.77233	4.79988	4.51534	5.96552	6	5.64434	3.97688	4	3.76089	600.2	6.05374	8.05389	-135.154	-0.0776223	-0.225181	-0.000119422	-1.19383e-06
Yb2O3	2.5	3.67578	3.01284	3.56937	3.27784	2.60206	3.17493	3.45393	2.79934	3.34518	-25.605	-25.5253	-25.6271	-38.8447	-39.9213	-38.5568	-16.7785	-16.385	-16.8905	6.65485	7.2233	6.49704	5.56013	6	5.44251	7.38467	8	7.20958	50.2	3.89856	4.82111	-128.025	-0.988366	-2.5503	-0.016171	-0.00193279
Yb2O3	5	4.57148	4.28171	4.25888	4.17354	3.88343	3.8613	4.34963	4.06009	4.03679	-25.4794	-25.7945	-25.1473	-39.372	-39.9273	-38.7877	-16.2177	-16.385	-16.0413	6.93836	7.20063	6.66193	5.79272	6	5.57459	7.70212	8	7.38782	100.2	4.49889	5.7216	-127.397	-1.61601	-1.27143	-0.00403901	-0.000241857
Yb2O3	7.5	5.10066	4.91395	4.64404	4.70272	4.51469	4.24854	4.87881	4.69297	4.42057	-25.6208	-25.7739	-25.3358	-39.6336	-39.9283	-39.0895	-16.279	-16.385	-16.0805	7.0261	7.20241	6.69787	5.86089	6	5.60413	7.80291	8	7.43388	150.2	4.85049	6.24901	-128.104	-0.909136	-0.85289	-0.00180748	-7.22029e-05
Yb2O3	10	5.4753	5.33769	4.90916	5.07736	4.94004	4.51045	5.25345	5.11565	4.68782	-25.6392	-25.8087	-25.1844	-39.7015	-39.9287	-39.0906	-16.2643	-16.385	-15.9409	7.06835	7.19947	6.71661	5.89448	6	5.61075	7.85092	8	7.45169	200.2	5.10008	6.62339	-128.196	-0.817323	-0.640339	-0.00101811	-3.05129e-05
Yb2O3	12.5	5.76634	5.65747	5.11217	5.3684	5.25937	4.71481	5.54449	5.43573	4.88994	-27.0421	-25.7991	-31.4049	-39.7464	-39.9291	-39.1061	-18.5725	-16.385	-26.2593	7.09363	7.2003	6.71923	5.91435	6	5.61423	7.87982	8	7.45753	250.2	5.29372	6.91386	-135.21	6.19722	-0.540409	-0.000687521	-1.64873e-05
Yb2O3	15	6.00389	5.9138	5.27648	5.60595	5.51549	4.88016	5.78204	5.6922	5.05355	-25.7078	-25.7944	-25.332	-39.7671	-39.9288	-39.0684	-16.335	-16.385	-16.1172	7.11342	7.20069	6.73483	5.93123	6	5.63423	7.90155	8	7.47314	300.2	5.45197	7.15123	-128.539	-0.474181	-0.428178	-0.000454008	-9.07412e-06
Yb2O3	17.5	6.20459	6.12796	5.41346	5.80665	5.73005	5.01539	5.98275	5.9061	5.1917	-25.7242	-25.8032	-25.3143	-39.8029	-39.9292	-39.1484	-16.3383	-16.385	-16.0963	7.12534	7.19995	6.73868	5.94023	6	5.6304	7.91541	8	7.47716	350.2	5.58578	7.35195	-128.621	-0.392465	-0.367278	-0.000333833	-5.71958e-06
Yb2O3	20	6.37829	6.31154	5.53202	5.98035	5.91367	5.13367	6.15645	6.08965	5.31045	-25.7319	-25.8042	-25.2971	-39.8099	-39.9291	-39.0911	-16.3466	-16.385	-16.1157	7.13482	7.19987	6.74328	5.94799	6	5.63461	7.92604	8	7.48123	400.2	5.7017	7.52583	-128.66	-0.353639	-0.321488	-0.000255704	-3.83365e-06
Yb2O3	22.5	6.53198	6.47267	5.638	6.13404	6.07479	5.23964	6.31013	6.25078	5.41644	-25.745	-25.8041	-25.3414	-39.8316	-39.9293	-39.1633	-16.3539	-16.385	-16.1417	7.14204	7.19989	6.74673	5.95357	6	5.63595	7.93435	8	7.48606	450.2	5.80396	7.67922	-128.725	-0.288212	-0.285929	-0.000202163	-2.69431e-06
Yb2O3	25	6.6692	6.61601	5.73094	6.27126	6.21814	5.33248	6.44735	6.39412	5.50943	-25.7451	-25.8041	-25.2923	-39.8307	-39.9292	-39.0743	-16.3547	-16.385	-16.1225	7.14796	7.19988	6.74948	5.95861	6	5.64055	7.94085	8	7.4873	500.2	5.89544	7.81643	-128.726	-0.28759	-0.257348	-0.000163768	-1.96442e-06
Yb2O3	27.5	6.7933	6.74502	5.81537	6.39536	6.3471	5.41725	6.57145	6.52316	5.59364	-25.7531	-25.8031	-25.3273	-39.8457	-39.9292	-39.1356	-16.358	-16.385	-16.1282	7.15269	7.19996	6.75063	5.96224	6	5.64097	7.94631	8	7.48989	550.2	5.97819	7.94056	-128.765	-0.247869	-0.234034	-0.000135397	-1.47652e-06
Yb2O3	30	6.90676	6.86261	5.892	6.50882	6.4646	5.49476	6.68491	6.64082	5.66968	-25.8432	-25.801	-26.2377	-39.8551	-39.9291	-39.1643	-16.502	-16.385	-17.5965	7.15642	7.20014	6.74781	5.96507	6	5.63918	7.95065	8	7.4889	600.2	6.05374	8.05389	-129.216	0.202886	-0.215288	-0.000114176	-1.14138e-06
ZrO2	2.5	3.74764	3.08243	3.64187	3.27045	2.60423	3.16495	3.57159	2.90687	3.46568	-32.1343	-32.7858	-31.9547	-68.6565	-70.1166	-68.255	-13.8782	-14.1897	-13.7921	4.37547	4.66501	4.29562	6.08637	6.5	5.97264	3.52025	3.75093	3.45654	50.2	3.89856	4.82111	-96.403	-7.64928	-1.92038	-0.0121768	-0.00145539
ZrO2	5	4.65138	4.35951	4.341	4.17426	3.8827	3.86356	4.47529	4.18327	4.16507	-32.3976	-32.7553	-32.0244	-69.4001	-70.1096	-68.6587	-13.8964	-14.0585	-13.7273	4.52201	4.66796	4.36971	6.28767	6.50098	6.06476	3.63918	3.75049	3.52311	100.2	4.49889	5.7216	-97.1929	-6.85941	-0.969989	-0.00308141	-0.000184515
ZrO2	7.5	5.17898	4.99258	4.72177	4.70185	4.51537	4.2448	5.00289	4.81653	4.5456	-32.6609	-32.739	-32.0941	-70.1438	-70.1126	-69.0624	-13.9146	-14.0576	-13.6625	4.56681	4.66677	4.38032	6.35859	6.50055	6.0939	3.67092	3.75015	3.52309	150.2	4.85049	6.24901	-97.9827	-6.06954	-7.10239	-0.00105576	-3.46211e-05
ZrO2	10	5.55383	5.41639	4.98726	5.07671	4.93926	4.51014	5.37774	5.2403	4.81117	-32.598	-32.748	-32.195	-69.7529	-70.1166	-68.7761	-14.0206	-14.0639	-13.9042	4.5923	4.66663	4.39266	6.39474	6.49998	6.11205	3.69109	3.74996	3.53296	200.2	5.10008	6.62339	-97.794	-6.2583	-0.488481	-0.000776666	-2.32767e-05
ZrO2	12.5	5.84447	5.73583	5.18952	5.36735	5.25865	4.71257	5.66838	5.55976	5.01333	-32.6183	-32.7461	-32.1689	-69.8072	-70.1168	-68.7184	-14.0239	-14.064	-13.8828	4.60747	4.66652	4.39972	6.4161	6.49995	6.12126	3.70316	3.74997	3.53842	250.2	5.29372	6.91386	-97.855	-6.19727	-0.391107	-0.000497575	-1.19323e-05
ZrO2	15	6.08208	5.99217	5.35395	5.60496	5.51496	4.87721	5.90599	5.81612	5.17766	-32.6418	-32.7438	-32.1984	-69.8651	-70.1171	-68.7706	-14.0302	-14.0629	-13.888	4.61751	4.66644	4.40479	6.43004	6.49991	6.12663	3.71124	3.74999	3.54273	300.2	5.45197	7.15123	-97.9255	-6.12678	-0.326201	-0.000345879	-6.91298e-06
ZrO2	17.5	6.28291	6.20624	5.49197	5.80579	5.72911	5.01493	6.10682	6.03016	5.31584	-32.6575	-32.7463	-32.1972	-69.9029	-70.1165	-68.7966	-14.0347	-14.0621	-13.8928	4.62435	4.66664	4.40535	6.43976	6.49999	6.12787	3.71665	3.75001	3.54387	350.2	5.58578	7.35195	-97.9724	-6.07991	-0.279761	-0.000254285	-4.35669e-06
ZrO2	20	6.45688	6.39004	5.61117	5.97976	5.9129	5.13415	6.28079	6.21396	5.43503	-32.6695	-32.7466	-32.2062	-69.9326	-70.1158	-68.8321	-14.0379	-14.063	-13.887	4.62968	4.66667	4.40735	6.44733	6.50009	6.13031	3.72085	3.75001	3.54557	400.2	5.7017	7.52583	-98.0085	-6.04377	-0.244899	-0.000194787	-2.92034e-06
ZrO2	22.5	6.61038	6.55109	5.71622	6.13326	6.074	5.23888	6.43429	6.37499	5.54024	-33.0403	-32.749	-35.0323	-69.9508	-70.1163	-68.8188	-14.5851	-14.0632	-18.1518	4.63398	4.66674	4.41	6.4532	6.50002	6.13288	3.72437	3.74999	3.54921	450.2	5.80396	7.67922	-99.121	-4.93132	-0.220171	-0.00015567	-2.07468e-06
ZrO2	25	6.7476	6.69442	5.8092	6.27048	6.21734	5.33176	6.57151	6.51831	5.63326	-32.6859	-32.7496	-32.1971	-69.969	-70.1168	-68.8337	-14.0443	-14.0633	-13.8989	4.6371	4.66674	4.4095	6.45794	6.49995	6.13511	3.72668	3.75001	3.54764	500.2	5.89544	7.81643	-98.0577	-5.99455	-0.196037	-0.000124751	-1.49642e-06
ZrO2	27.5	6.8718	6.82352	5.89387	6.39468	6.3464	5.41673	6.69571	6.64742	5.71778	-32.7192	-32.7477	-32.4768	-69.9807	-70.1166	-68.8249	-14.0884	-14.0631	-14.3035	4.63984	4.66665	4.4118	6.46176	6.49997	6.13676	3.72888	3.74999	3.54935	550.2	5.97819	7.94056	-98.1575	-5.89474	-0.178403	-0.000103213	-1.12555e-06
ZrO2	30	6.98515	6.94098	5.97054	6.50803	6.46386	5.49341	6.80906	6.76489	5.79445	-32.6949	-32.7475	-32.2038	-69.9912	-70.1162	-68.8234	-14.0468	-14.0631	-13.8946	4.64199	4.66668	4.41134	6.46495	6.50004	6.13722	3.73051	3.75001	3.54843	600.2	6.05374	8.05389	-98.0847	-5.96756	-0.16342	-8.66681e-05	-8.66393e-07
SiO2	2.5	3.72016	3.04883	3.61606	3.24304	2.56348	3.14114	3.54407	2.87679	3.43886	-41.8931	-42.2113	-41.8069	-80.3349	-81.5061	-80.0252	-22.6722	-23.1118	-22.5517	2.54362	2.65416	2.51368	3.80514	4	3.75361	1.91286	2	1.88897	50.2	3.89856	4.82111	-125.679	-2.0509	-2.50357	-0.0158747	-0.00189738
SiO2	5	4.6201	4.3293	4.30861	4.14298	3.8526	3.83104	4.44401	4.15299	4.13274	-42.2766	-42.5957	-41.9419	-80.9022	-81.5061	-80.2676	-22.9638	-23.1118	-22.8087	2.60225	2.66732	2.534	3.90265	4	3.80035	1.95205	2	1.9018	100.2	4.49889	5.7216	-126.83	-0.900383	-1.26577	-0.00402102	-0.000240779
SiO2	7.5	5.14833	4.96198	4.69104	4.67121	4.48498	4.21368	4.97224	4.78583	4.51507	-42.3729	-42.5821	-41.9826	-81.0885	-81.506	-80.3087	-23.0153	-23.1118	-22.8354	2.62323	2.66686	2.54181	3.93504	4	3.81371	1.96733	2	1.90638	150.2	4.85049	6.24901	-127.119	-0.611383	-0.84633	-0.00179358	-7.16475e-05
SiO2	10	5.52322	5.3858	4.9566	5.0461	4.9087	4.4794	5.34713	5.20969	4.78055	-42.4371	-42.5778	-42.0593	-81.2047	-81.506	-80.3948	-23.0534	-23.1118	-22.8967	2.63407	2.66671	2.5464	3.95131	4	3.82048	1.97546	2	1.90953	200.2	5.10008	6.62339	-127.311	-0.418772	-0.635921	-0.00101109	-3.03024e-05
SiO2	12.5	5.81395	5.70534	5.15885	5.33683	5.22818	4.68185	5.63786	5.52926	4.98271	-42.6107	-42.5751	-42.736	-81.4951	-81.506	-81.4565	-23.1685	-23.1118	-23.368	2.64111	2.66662	2.55132	3.96154	4	3.82622	1.98089	2	1.91362	250.2	5.29372	6.91386	-127.832	0.101907	-0.51092	-0.000650003	-1.55876e-05
SiO2	15	6.05155	5.96164	5.32337	5.57442	5.48459	4.84595	5.87545	5.78551	5.14743	-42.478	-42.5796	-42.036	-81.3067	-81.506	-80.4392	-23.0636	-23.1118	-22.8541	2.64528	2.66677	2.55183	3.96777	4	3.82754	1.98403	2	1.91463	300.2	5.45197	7.15123	-127.434	-0.296254	-0.424497	-0.000450105	-8.9961e-06
SiO2	17.5	6.25235	6.17571	5.46124	5.77523	5.69859	4.98414	6.07626	5.99962	5.28514	-42.4921	-42.5763	-42.0559	-81.3354	-81.506	-80.4513	-23.0705	-23.1118	-22.8565	2.64836	2.66666	2.55353	3.97243	4	3.8296	1.98632	2	1.91544	350.2	5.58578	7.35195	-127.476	-0.253726	-0.36401	-0.000330863	-5.66869e-06
SiO2	20	6.42631	6.35947	5.58056	5.94918	5.88236	5.10336	6.25021	6.18337	5.4045	-42.5029	-42.5771	-42.0572	-81.3554	-81.506	-80.4501	-23.0767	-23.1118	-22.8657	2.65054	2.66669	2.55351	3.97582	4	3.83043	1.9879	2	1.91521	400.2	5.7017	7.52583	-127.509	-0.221319	-0.318613	-0.000253417	-3.79936e-06
SiO2	22.5	6.57976	6.5205	5.68548	6.10264	6.04333	5.20865	6.40367	6.34443	5.50924	-42.5113	-42.5746	-42.0781	-81.3727	-81.506	-80.4611	-23.0806	-23.1118	-22.8672	2.65235	2.6666	2.55487	3.97852	4	3.83171	1.98926	2	1.9158	450.2	5.80396	7.67922	-127.534	-0.19626	-0.283283	-0.000200293	-2.66938e-06
SiO2	25	6.71706	6.66383	5.7791	6.23994	6.18668	5.30214	6.54097	6.48774	5.60293	-42.5172	-42.5756	-42.069	-81.3858	-81.506	-80.4641	-23.0829	-23.1118	-22.861	2.65376	2.66664	2.55502	3.98059	4	3.83182	1.99034	2	1.91627	500.2	5.89544	7.81643	-127.552	-0.17859	-0.255001	-0.000162274	-1.94651e-06
SiO2	27.5	6.84122	6.79295	5.86327	6.3641	6.31585	5.38596	6.66513	6.61684	5.68727	-42.5221	-42.5776	-42.0509	-81.3966	-81.506	-80.4655	-23.0849	-23.1118	-22.8561	2.65493	2.6667	2.55482	3.98231	4	3.83176	1.99124	2	1.91677	550.2	5.97819	7.94056	-127.566	-0.163728	-0.231855	-0.000134136	-1.46277e-06
SiO2	30	6.95452	6.91042	5.93929	6.47739	6.4333	5.4621	6.77842	6.73432	5.76323	-42.5271	-42.5769	-42.0608	-81.4054	-81.506	-80.4631	-23.0879	-23.1118	-22.8643	2.6559	2.66668	2.55507	3.98382	4	3.83242	1.99194	2	1.91655	600.2	6.05374	8.05389	-127.581	-0.148973	-0.212564	-0.000112731	-1.12694e-06
HfO2	2.5	3.7696	3.10346	3.66408	3.29248	2.63246	3.18526	3.59351	2.92428	3.48883	-36.4014	-37.1834	-36.1863	-73.6139	-74.7849	-73.286	-17.7952	-17.9798	-17.7448	8.67041	9.32388	8.49068	7.46711	8	7.31789	9.27206	10	9.07365	50.2	3.89856	4.82111	-109.204	-1.54021	-2.17538	-0.0137937	-0.00164865
HfO2	5	4.67255	4.38005	4.36282	4.19543	3.90347	3.88513	4.49646	4.20369	4.18701	-36.5517	-36.9385	-36.1492	-74.1571	-74.7849	-73.5023	-17.7489	-17.9798	-17.509	8.99071	9.3325	8.63509	7.72626	8	7.44072	9.62294	10	9.23111	100.2	4.49889	5.7216	-109.655	-1.08948	-1.09436	-0.00347651	-0.000208174
HfO2	7.5	5.20078	5.01286	4.7464	4.72366	4.53429	4.27193	5.02469	4.83749	4.56898	-36.798	-36.852	-36.6984	-74.3788	-74.7849	-73.636	-18.0076	-17.9798	-18.0592	9.10858	9.33555	8.68937	7.81912	8	7.48818	9.7533	10	9.2955	150.2	4.85049	6.24901	-110.394	-0.350411	-0.73498	-0.0015576	-6.2221e-05
HfO2	10	5.57503	5.43762	5.00837	5.09791	4.96178	4.5278	5.39894	5.26089	4.83399	-36.768	-36.9705	-36.2239	-74.4441	-74.7849	-73.5186	-17.93	-17.9798	-17.7968	9.16775	9.33137	8.72812	7.86726	8	7.50669	9.818	10	9.33162	200.2	5.10008	6.62339	-110.304	-0.440401	-0.550969	-0.000876019	-2.62543e-05
HfO2	12.5	5.86583	5.75644	5.2135	5.38871	5.27894	4.73769	5.68974	5.58053	5.03676	-36.7809	-36.8984	-36.3706	-74.4707	-74.7849	-73.3782	-17.936	-17.9798	-17.7829	9.20002	9.33391	8.73262	7.89382	8	7.5246	9.85312	10	9.33938	250.2	5.29372	6.91386	-110.343	-0.401746	-0.441018	-0.000561073	-1.3455e-05
HfO2	15	6.10305	6.01303	5.37536	5.62592	5.53639	4.89613	5.92695	5.83669	5.20032	-36.8419	-36.936	-36.4336	-74.5903	-74.7849	-73.7405	-17.9677	-17.9798	-17.9155	9.22296	9.33259	8.74696	7.9116	8	7.52551	9.87863	10	9.35325	300.2	5.45197	7.15123	-110.526	-0.218704	-0.368174	-0.000390384	-7.80248e-06
HfO2	17.5	6.30416	6.22694	5.51607	5.82704	5.7499	5.03854	6.12807	6.05081	5.34018	-38.5885	-36.9183	-36.4863	-74.6068	-74.7849	-73.691	-18.0322	-17.9798	-17.9426	9.23621	9.33321	8.73774	7.92161	8	7.5183	9.89352	10	9.3466	350.2	5.58578	7.35195	-115.765	0.184584	-0.330569	-0.000300467	-5.14792e-06
HfO2	20	6.47793	6.41087	5.63356	6.00081	5.93372	5.15657	6.30184	6.23479	5.45739	-36.8623	-36.9138	-36.5541	-74.6399	-74.7849	-73.7722	-17.9736	-17.9798	-17.9361	9.25053	9.33337	8.75446	7.93355	8	7.53579	9.90902	10	9.36409	400.2	5.7017	7.52583	-110.587	-0.15746	-0.276329	-0.000219786	-3.29514e-06
HfO2	22.5	6.63131	6.57208	5.73678	6.15419	6.09487	5.26028	6.45522	6.39603	5.56038	-36.8554	-36.9109	-36.4757	-74.6481	-74.7849	-73.714	-17.959	-17.9798	-17.8169	9.25976	9.33347	8.75533	7.94094	8	7.53741	9.91918	10	9.36559	450.2	5.80396	7.67922	-110.566	-0.178229	-0.245594	-0.000173645	-2.31423e-06
HfO2	25	6.76869	6.71543	5.83093	6.29157	6.23841	5.35301	6.5926	6.53929	5.65524	-36.8612	-36.9194	-36.4156	-74.6615	-74.7849	-73.7137	-17.9611	-17.9798	-17.8181	9.26715	9.33317	8.76105	7.94695	8	7.53951	9.92724	10	9.37014	500.2	5.89544	7.81643	-110.584	-0.16075	-0.221079	-0.000140687	-1.68757e-06
HfO2	27.5	6.8928	6.84447	5.91525	6.41568	6.36739	5.43783	6.71671	6.66836	5.73931	-37.7021	-36.9164	-36.5486	-74.6744	-74.7849	-73.7355	-19.2159	-17.9798	-17.9245	9.27216	9.33328	8.75291	7.95076	8	7.53206	9.93286	10	9.3627	550.2	5.97819	7.94056	-112.004	-0.180183	-0.205573	-0.000118931	-1.29696e-06
HfO2	30	7.00613	6.96192	5.99202	6.52901	6.48483	5.51454	6.83004	6.78581	5.81611	-37.7015	-36.9165	-36.5758	-74.6875	-74.7849	-73.7779	-18.4838	-17.9798	-17.9413	9.27804	9.33327	8.7627	7.95558	8	7.54077	9.93927	10	9.37291	600.2	6.05374	8.05389	-112.224	-0.204874	-0.164256	-7.93817e-05	-9.0635e-07
CuO	2.5	3.81211	3.14208	3.70766	3.51108	2.84136	3.40654	3.51108	2.84073	3.40671	-19.8489	-20.4333	-19.69	-19.6712	-20.2866	-19.5037	-20.0266	-20.5802	-19.8762	3.30764	3.5119	3.25211	3.31227	3.51873	3.25608	3.30302	3.50505	3.24814	50.2	3.89856	4.82111	-39.6978	0.445891	-0.790793	-0.00501429	-0.000599317
CuO	5	4.71317	4.42241	4.40162	4.41214	4.12123	4.10075	4.41214	4.12153	4.10044	-20.2143	-20.4093	-20.0098	-20.0319	-20.248	-19.8053	-20.3968	-20.5705	-20.2144	3.40266	3.50093	3.29957	3.40238	3.50121	3.29879	3.40293	3.50064	3.30035	100.2	4.49889	5.7216	-40.4286	1.17672	-0.403479	-0.00128175	-7.67516e-05
CuO	7.5	5.24137	5.05505	4.784	4.94034	4.75405	4.48292	4.94034	4.75399	4.48303	-20.2578	-20.4069	-19.9796	-20.1036	-20.2453	-19.8391	-20.4121	-20.5685	-20.1201	3.43453	3.49986	3.31258	3.43453	3.49997	3.31234	3.43453	3.49974	3.31281	150.2	4.85049	6.24901	-40.5157	1.26375	-0.269745	-0.000571654	-2.28357e-05
CuO	10	5.61626	5.47889	5.0495	5.31523	5.17792	4.7483	5.31523	5.17779	4.74865	-20.2926	-20.4069	-19.9854	-20.1362	-20.2452	-19.8429	-20.4491	-20.5687	-20.1279	3.45078	3.49988	3.3188	3.45093	3.49996	3.31906	3.45063	3.4998	3.31854	200.2	5.10008	6.62339	-40.5852	1.33333	-0.202723	-0.000322322	-9.66e-06
CuO	12.5	5.90702	5.79835	5.25211	5.60599	5.4974	4.95081	5.60599	5.49725	4.95135	-20.3474	-20.4071	-20.1371	-20.1585	-20.2452	-19.8533	-20.5362	-20.5691	-20.4205	3.46056	3.49998	3.32188	3.46039	3.49996	3.3211	3.46073	3.50001	3.32267	250.2	5.29372	6.91386	-40.6947	1.4428	-0.162649	-0.000206925	-4.96224e-06
CuO	15	6.14454	6.05466	5.41625	5.84351	5.75363	5.11524	5.84351	5.75363	5.11521	-20.3305	-20.4071	-19.9974	-20.1729	-20.2452	-19.8584	-20.4882	-20.5691	-20.1365	3.46702	3.49997	3.32371	3.46699	3.49995	3.32366	3.46704	3.49998	3.32376	300.2	5.45197	7.15123	-40.6611	1.40917	-0.135447	-0.000143618	-2.87044e-06
CuO	17.5	6.34539	6.26872	5.55442	6.04436	5.96764	5.25367	6.04436	5.96775	5.25311	-20.342	-20.4072	-20.0044	-20.1834	-20.2453	-19.8633	-20.5006	-20.5691	-20.1456	3.47175	3.49999	3.32543	3.47172	3.49999	3.32539	3.47177	3.5	3.32547	350.2	5.58578	7.35195	-40.684	1.43213	-0.116174	-0.000105595	-1.80916e-06
CuO	20	6.51938	6.45255	5.67353	6.21835	6.15152	5.37255	6.21835	6.15153	5.37245	-20.3513	-20.4071	-20.0154	-20.1907	-20.2452	-19.8633	-20.5118	-20.569	-20.1675	3.47529	3.49997	3.32695	3.47525	3.49996	3.3267	3.47533	3.49997	3.3272	400.2	5.7017	7.52583	-40.7025	1.4506	-0.101705	-8.08942e-05	-1.21281e-06
CuO	22.5	6.67282	6.61355	5.77858	6.37179	6.31251	5.47764	6.37179	6.31254	5.47745	-20.3545	-20.4071	-19.9941	-20.1941	-20.2452	-19.8453	-20.5148	-20.5691	-20.1431	3.4781	3.49997	3.32858	3.47821	3.49993	3.32969	3.478	3.50001	3.32746	450.2	5.80396	7.67922	-40.7089	1.45699	-0.090424	-6.39335e-05	-8.52068e-07
CuO	25	6.81009	6.7569	5.87187	6.50906	6.45587	5.57081	6.50906	6.45586	5.57086	-20.3612	-20.4072	-20.0082	-20.2013	-20.2452	-19.8641	-20.5211	-20.5691	-20.1524	3.48032	3.49998	3.3294	3.48035	3.49995	3.32992	3.48028	3.50001	3.32888	500.2	5.89544	7.81643	-40.7223	1.47043	-0.0814121	-5.18078e-05	-6.21446e-07
CuO	27.5	6.93427	6.88601	5.95617	6.63324	6.58499	5.65508	6.63324	6.58497	5.6552	-20.3655	-20.4072	-20.0107	-20.2055	-20.2453	-19.8668	-20.5255	-20.5691	-20.1546	3.48209	3.49999	3.32979	3.48211	3.49998	3.33001	3.48207	3.5	3.32957	550.2	5.97819	7.94056	-40.731	1.47905	-0.0740294	-4.28286e-05	-4.67051e-07
CuO	30	7.04765	7.00345	6.03338	6.74662	6.70241	5.73241	6.74662	6.70242	5.7323	-20.3741	-20.4072	-20.0647	-20.2085	-20.2453	-19.8646	-20.5396	-20.5691	-20.265	3.48359	3.5	3.33043	3.48351	3.50001	3.32953	3.48367	3.49999	3.33134	600.2	6.05374	8.05389	-40.7481	1.49621	-0.0678909	-3.60052e-05	-3.59932e-07
CoO	2.5	3.832	3.15198	3.73022	3.53097	2.83442	3.43345	3.53097	2.86688	3.42488	-19.6099	-20.026	-19.5	-19.4242	-19.901	-19.3042	-19.7956	-20.1421	-19.6998	5.61808	6	5.51722	5.63339	6	5.5411	5.60277	6	5.49286	50.2	3.89856	4.82111	-39.2198	-0.823252	-0.781271	-0.00495391	-0.000592101
CoO	5	4.73598	4.44105	4.42877	4.43495	4.14023	4.12753	4.43495	4.13982	4.12795	-19.7469	-20.0215	-19.4644	-19.5337	-19.901	-19.1555	-19.96	-20.1421	-19.7729	5.8163	6	5.62733	5.83467	6	5.66443	5.79794	6	5.59027	100.2	4.49889	5.7216	-39.4937	-0.549347	-0.394149	-0.00125211	-7.49767e-05
CoO	7.5	5.2602	5.07294	4.8046	4.95918	4.77308	4.5014	4.95918	4.77075	4.50572	-19.9106	-20.0212	-19.7055	-19.7873	-19.901	-19.5749	-20.0339	-20.1421	-19.8348	5.87258	6	5.63621	5.87451	6	5.63994	5.87064	6	5.63251	150.2	4.85049	6.24901	-39.8213	-0.221823	-0.265122	-0.000561856	-2.24443e-05
CoO	10	5.63507	5.49732	5.06932	5.33404	5.19644	4.76789	5.33404	5.19614	4.7687	-19.9462	-20.0215	-19.7446	-19.8271	-19.901	-19.6291	-20.0654	-20.1421	-19.86	5.90411	6	5.6472	5.90446	6	5.64817	5.90376	6	5.64623	200.2	5.10008	6.62339	-39.8925	-0.150583	-0.199263	-0.00031682	-9.49512e-06
CoO	12.5	5.92589	5.8167	5.27282	5.62486	5.51574	4.97154	5.62486	5.5156	4.97204	-19.9493	-20.0215	-19.6968	-19.8209	-19.901	-19.5407	-20.0777	-20.1421	-19.8527	5.92397	6	5.65796	5.926	6	5.66692	5.92193	6	5.649	250.2	5.29372	6.91386	-39.8987	-0.1444	-0.159467	-0.000202878	-4.86517e-06
CoO	15	6.16325	6.07338	5.43491	5.86222	5.77228	5.13421	5.86222	5.77243	5.13355	-19.9657	-20.0216	-19.7227	-19.8421	-19.901	-19.5861	-20.0893	-20.1421	-19.8595	5.93627	6	5.65905	5.93732	6	5.6649	5.93522	6	5.65318	300.2	5.45197	7.15123	-39.9314	-0.111688	-0.133016	-0.00014104	-2.81893e-06
CoO	17.5	6.36413	6.28746	5.57321	6.0631	5.98617	5.27349	6.0631	5.98668	5.27087	-19.9689	-20.0216	-19.6958	-19.8424	-19.901	-19.5401	-20.0953	-20.1421	-19.8523	5.94564	6	5.66411	5.9473	6	5.67533	5.94398	6	5.65283	350.2	5.58578	7.35195	-39.9377	-0.105332	-0.114043	-0.000103658	-1.77597e-06
CoO	20	6.53809	6.47113	5.69312	6.23706	6.16996	5.39289	6.23706	6.17023	5.3913	-20.2067	-20.0216	-21.3169	-19.8641	-19.901	-19.6432	-20.5493	-20.1421	-22.9967	5.95229	6	5.66611	5.95144	6	5.66077	5.95314	6	5.67147	400.2	5.7017	7.52583	-40.4134	0.370273	-0.100983	-8.03195e-05	-1.20419e-06
CoO	22.5	6.69151	6.63224	5.79724	6.39048	6.33125	5.49594	6.39048	6.33117	5.49649	-19.9855	-20.0215	-19.7391	-19.8637	-19.901	-19.6085	-20.1073	-20.1421	-19.8694	5.95752	6	5.667	5.95807	6	5.67113	5.95697	6	5.66288	450.2	5.80396	7.67922	-39.971	-0.0720856	-0.088785	-6.27746e-05	-8.36623e-07
CoO	25	6.82872	6.77556	5.8902	6.52769	6.47465	5.58826	6.52769	6.47442	5.59007	-19.9996	-20.0215	-19.8311	-19.8721	-19.901	-19.65	-20.127	-20.1421	-20.0114	5.96173	6	5.6678	5.96127	6	5.66314	5.96219	6	5.67245	500.2	5.89544	7.81643	-39.9991	-0.0439455	-0.0799663	-5.08878e-05	-6.10409e-07
CoO	27.5	6.953	6.90468	5.97542	6.65197	6.60363	5.67453	6.65197	6.60366	5.67424	-20.1226	-20.0215	-20.9815	-19.8746	-19.901	-19.6507	-20.3706	-20.1421	-22.3132	5.96527	6	5.67019	5.96475	6	5.66534	5.9658	6	5.67505	550.2	5.97819	7.94056	-40.2453	0.202181	-0.0731466	-4.23179e-05	-4.61482e-07
CoO	30	7.06631	7.02208	6.05232	6.76528	6.72104	5.75134	6.76528	6.72105	5.75125	-19.9964	-20.0215	-19.7616	-19.8762	-19.901	-19.6456	-20.1165	-20.1421	-19.8777	5.96805	6	5.67002	5.96818	6	5.67141	5.96792	6	5.66864	600.2	6.05374	8.05389	-39.9927	-0.05033	-0.0666324	-3.53378e-05	-3.5326e-07
SnO2	2.5	3.74733	3.08099	3.64187	3.27021	2.61595	3.16137	3.57124	2.89873	3.46746	-36.767	-38.1988	-36.3735	-73.3208	-74.505	-72.9835	-18.4901	-19.2665	-18.2806	3.78493	4.02822	3.71807	5.6044	6	5.49172	2.8752	3	2.84151	50.2	3.89856	4.82111	-110.301	-2.73684	-2.19723	-0.0139323	-0.00166521
SnO2	5	4.64317	4.35135	4.33272	4.16605	3.87186	3.85806	4.46708	4.17644	4.1554	-37.3796	-37.5793	-37.1712	-73.8391	-74.505	-73.1518	-19.1499	-19.2665	-19.0275	3.87565	3.99457	3.75151	5.8162	6	5.62646	2.90537	3	2.80604	100.2	4.49889	5.7216	-112.139	-0.899089	-1.11915	-0.00355525	-0.00021289
SnO2	7.5	5.17168	4.98451	4.7159	4.69456	4.50798	4.23769	4.99559	4.80813	4.54035	-38.1148	-37.7041	-38.8772	-75.1239	-74.505	-76.277	-19.6103	-19.2665	-20.2473	3.92098	4.00135	3.77179	5.87251	6	5.63496	2.94521	3	2.8437	150.2	4.85049	6.24901	-114.344	1.30653	-0.761281	-0.00161334	-6.44476e-05
SnO2	10	5.54588	5.40834	4.97958	5.06876	4.93038	4.50469	5.36979	5.23267	4.80236	-37.5645	-37.6439	-37.3515	-74.2333	-74.505	-73.5094	-19.2302	-19.2665	-19.1323	3.93902	3.99808	3.78052	5.90839	6	5.66424	2.95434	3	2.83135	200.2	5.10008	6.62339	-112.694	-0.344289	-0.562905	-0.000894997	-2.68231e-05
SnO2	12.5	5.83668	5.72799	5.18187	5.35956	5.25127	4.70334	5.66059	5.5517	5.00647	-37.5727	-37.6962	-37.1384	-74.2867	-74.505	-73.5157	-19.2157	-19.2665	-19.0376	3.95112	4.00092	3.77602	5.92567	6	5.66319	2.96385	3	2.837	250.2	5.29372	6.91386	-112.718	-0.319833	-0.450512	-0.000573151	-1.37446e-05
SnO2	15	6.07395	5.9841	5.34553	5.59683	5.50684	4.869	5.89786	5.80808	5.16915	-37.6012	-37.6736	-37.2861	-74.3384	-74.505	-73.6149	-19.2326	-19.2665	-19.085	3.95935	3.99969	3.78385	5.93839	6	5.67081	2.96983	3	2.83847	300.2	5.45197	7.15123	-112.804	-0.234365	-0.375761	-0.00039843	-7.96328e-06
SnO2	17.5	6.27488	6.19832	5.48342	5.79776	5.72135	5.0055	6.09879	6.02215	5.30772	-37.6043	-37.6858	-37.1816	-74.3444	-74.505	-73.5097	-19.2342	-19.2665	-19.0673	3.96463	4.00035	3.77936	5.94701	6	5.67154	2.97344	3	2.83585	350.2	5.58578	7.35195	-112.813	-0.225024	-0.322139	-0.000292804	-5.01663e-06
SnO2	20	6.44887	6.38201	5.60329	5.97175	5.90487	5.12628	6.27278	6.20593	5.42714	-40.8915	-37.6785	-60.1951	-76.0132	-74.505	-85.0713	-23.3307	-19.2665	-47.7519	3.96957	3.99996	3.787	5.95366	6	5.67536	2.97752	3	2.84243	400.2	5.7017	7.52583	-122.675	9.63662	-0.306533	-0.000243809	-3.65531e-06
SnO2	22.5	6.60229	6.54303	5.70795	6.12517	6.06584	5.23129	6.4262	6.36697	5.53163	-37.6218	-37.6765	-37.2476	-74.3794	-74.505	-73.5217	-19.2429	-19.2665	-19.0819	3.97252	3.99985	3.78559	5.95888	6	5.67798	2.97933	3	2.83789	450.2	5.80396	7.67922	-112.865	-0.172603	-0.2507	-0.000177255	-2.36236e-06
SnO2	25	6.73962	6.68634	5.80203	6.26249	6.2092	5.32504	6.56352	6.51025	5.62587	-37.8093	-37.6786	-38.8109	-74.4777	-74.505	-74.2684	-19.4752	-19.2665	-21.0742	3.97568	3.99996	3.7897	5.96296	6	5.67925	2.98205	3	2.84449	500.2	5.89544	7.81643	-113.428	0.390042	-0.226765	-0.000144306	-1.73097e-06
SnO2	27.5	6.86373	6.81548	5.88559	6.38661	6.33831	5.40884	6.68764	6.63941	5.70931	-37.6314	-37.6774	-37.2399	-74.3995	-74.505	-73.5029	-19.2474	-19.2665	-19.085	3.9776	3.9999	3.78789	5.96653	6	5.68203	2.98314	3	2.8396	550.2	5.97819	7.94056	-112.894	-0.143633	-0.205188	-0.000118708	-1.29453e-06
SnO2	30	6.97711	6.93294	5.96255	6.49999	6.45587	5.48496	6.80102	6.75682	5.78668	-37.7122	-37.6814	-37.9995	-74.5144	-74.505	-74.6025	-19.311	-19.2665	-19.7271	3.97956	4.00011	3.78757	5.96915	6	5.68066	2.98476	3	2.84253	600.2	6.05374	8.05389	-113.136	0.0985516	-0.188498	-9.9968e-05	-9.99346e-07
TiO2	2.5	3.80223	3.13513	3.69697	3.3251	2.65801	3.21985	3.62613	2.95904	3.52088	-39.4746	-40.4816	-39.1984	-77.0658	-79.3423	-76.4415	-20.679	-21.0512	-20.5769	3.76317	4	3.69821	5.65705	6	5.56299	2.81623	3	2.76582	50.2	3.89856	4.82111	-118.424	-3.01931	-2.35904	-0.0149583	-0.00178784
TiO2	5	4.70233	4.4114	4.39095	4.22521	3.93586	3.91217	4.52624	4.23452	4.21569	-40.1626	-40.5524	-39.754	-78.6784	-79.3423	-77.9772	-20.9047	-21.0512	-20.7517	3.88227	4.00365	3.75505	5.82365	6	5.63741	2.91159	3	2.81926	100.2	4.49889	5.7216	-120.488	-0.955283	-1.20247	-0.00381995	-0.00022874
TiO2	7.5	5.23018	5.0437	4.7731	4.75305	4.5672	4.29482	5.05408	4.8673	4.59759	-40.2699	-40.5093	-39.8234	-78.9077	-79.3423	-78.0939	-20.951	-21.0512	-20.7645	3.92166	4.00143	3.77291	5.8821	6	5.66134	2.94144	3	2.83246	150.2	4.85049	6.24901	-120.81	-0.633424	-0.804325	-0.00170456	-6.80916e-05
TiO2	10	5.60475	5.46756	5.0375	5.12763	4.99029	4.56077	5.42866	5.29154	4.86121	-40.3128	-40.4751	-39.8758	-78.9856	-79.3423	-78.0266	-20.9763	-21.0512	-20.7746	3.9409	3.99967	3.7827	5.91173	6	5.67442	2.95548	3	2.83556	200.2	5.10008	6.62339	-120.938	-0.504825	-0.604087	-0.000960474	-2.87854e-05
TiO2	12.5	5.89584	5.78693	5.24183	5.41872	5.30985	4.76456	5.71975	5.61081	5.06581	-40.9515	-40.4834	-42.5935	-79.0669	-79.3423	-78.1003	-21.8938	-21.0512	-24.849	3.95414	4.00009	3.79292	5.92816	6	5.67602	2.96713	3	2.85184	250.2	5.29372	6.91386	-122.854	1.41132	-0.491025	-0.000624692	-1.49806e-05
TiO2	15	6.1331	6.04307	5.40547	5.65598	5.56595	4.92836	5.95701	5.86698	5.22937	-40.3736	-40.4814	-39.9054	-79.1172	-79.3423	-78.1402	-21.0018	-21.0512	-20.7871	3.96059	3.99999	3.78956	5.94098	6	5.68476	2.9704	3	2.84191	300.2	5.45197	7.15123	-121.121	-0.32234	-0.403467	-0.000427806	-8.55043e-06
TiO2	17.5	6.33403	6.25727	5.54356	5.85691	5.78018	5.06625	6.15794	6.08116	5.36756	-40.3905	-40.4772	-39.9423	-79.155	-79.3423	-78.1882	-21.0082	-21.0512	-20.7858	3.96635	3.99977	3.79354	5.9494	6	5.68495	2.97622	3	2.85327	350.2	5.58578	7.35195	-121.172	-0.271573	-0.346402	-0.000315218	-5.40683e-06
TiO2	20	6.50788	6.44107	5.66194	6.03076	5.96406	5.18417	6.33179	6.26493	5.48617	-40.4054	-40.4864	-39.9189	-79.1789	-79.3423	-78.1947	-21.0187	-21.0512	-20.8233	3.97071	4.00025	3.79309	5.95587	6	5.69002	2.97813	3	2.84672	400.2	5.7017	7.52583	-121.216	-0.22676	-0.302889	-0.000240911	-3.61186e-06
TiO2	22.5	6.66135	6.60208	5.76713	6.18423	6.12498	5.28987	6.48526	6.42598	5.59111	-40.4458	-40.4825	-40.1951	-79.1959	-79.3423	-78.1944	-21.0708	-21.0512	-21.2047	3.97382	4.00005	3.79448	5.96056	6	5.69077	2.98045	3	2.8468	450.2	5.80396	7.67922	-121.338	-0.105583	-0.269519	-0.000190561	-2.53969e-06
TiO2	25	6.79861	6.74541	5.86046	6.32149	6.26829	5.38328	6.62252	6.56931	5.68439	-40.4392	-40.4819	-40.1114	-79.2108	-79.3423	-78.2019	-21.0534	-21.0512	-21.0696	3.97672	4.00002	3.79796	5.96461	6	5.69299	2.98277	3	2.85062	500.2	5.89544	7.81643	-121.318	-0.125569	-0.242538	-0.000154343	-1.85137e-06
TiO2	27.5	6.92278	6.87449	5.94488	6.44566	6.39742	5.46739	6.74669	6.69838	5.76898	-40.423	-40.4835	-39.9085	-79.2193	-79.3423	-78.1725	-21.0249	-21.0512	-20.8007	3.97864	4.0001	3.79613	5.96802	6	5.69582	2.98395	3	2.84748	550.2	5.97819	7.94056	-121.269	-0.174072	-0.220409	-0.000127514	-1.39056e-06
TiO2	30	7.03618	6.99199	6.02179	6.55906	6.51489	5.54443	6.86009	6.81588	5.84582	-40.8395	-40.4828	-44.1702	-79.2326	-79.3423	-78.2074	-21.643	-21.0512	-27.166	3.98061	4.00006	3.79896	5.9705	6	5.69491	2.98566	3	2.85179	600.2	6.05374	8.05389	-122.518	1.07538	-0.204129	-0.000108258	-1.08222e-06
MgO	2.5	3.84646	3.17696	3.74186	3.54543	2.8848	3.43838	3.54543	2.86688	3.44326	-20.2749	-20.7354	-20.1494	-20.302	-20.6344	-20.2091	-20.2477	-20.8407	-20.0905	5.63059	6	5.52999	5.61008	6	5.50109	5.6511	6	5.55856	50.2	3.89856	4.82111	-40.5497	-0.925368	-0.807763	-0.00512189	-0.000612178
MgO	5	4.74786	4.4537	4.43985	4.44683	4.1536	4.13786	4.44683	4.15174	4.13978	-20.5526	-20.7373	-20.362	-20.4649	-20.6344	-20.2891	-20.6404	-20.8407	-20.4345	5.81311	6	5.62016	5.80367	6	5.6001	5.82255	6	5.64014	100.2	4.49889	5.7216	-41.1053	-0.369803	-0.410232	-0.0013032	-7.80361e-05
MgO	7.5	5.2765	5.0898	4.81985	4.97547	4.78929	4.51784	4.97547	4.78824	4.5198	-20.5828	-20.7374	-20.295	-20.45	-20.6344	-20.1055	-20.7156	-20.8407	-20.4836	5.87524	6	5.64295	5.88176	6	5.66084	5.86872	6	5.62514	150.2	4.85049	6.24901	-41.1656	-0.309462	-0.274072	-0.000580824	-2.3202e-05
MgO	10	5.65046	5.513	5.08391	5.34943	5.2112	4.78494	5.34943	5.21274	4.78082	-20.6387	-20.7377	-20.3727	-20.5255	-20.6344	-20.235	-20.7518	-20.8407	-20.5117	5.90576	6	5.65266	5.90844	6	5.66411	5.90309	6	5.6411	200.2	5.10008	6.62339	-41.2774	-0.197691	-0.206181	-0.000327819	-9.82475e-06
MgO	12.5	5.94137	5.8323	5.28789	5.64034	5.53142	4.98634	5.64034	5.53112	4.98738	-21.0664	-20.7375	-22.2184	-20.5681	-20.6344	-20.3357	-21.5646	-20.8407	-24.0966	5.9248	6	5.6614	5.92245	6	5.65039	5.92715	6	5.67239	250.2	5.29372	6.91386	-42.1328	0.657721	-0.168396	-0.000214238	-5.13759e-06
MgO	15	6.17848	6.08851	5.45057	5.87745	5.78777	5.14828	5.87745	5.78719	5.1508	-20.6773	-20.7375	-20.416	-20.5716	-20.6344	-20.298	-20.783	-20.8407	-20.5333	5.93696	6	5.66308	5.93782	6	5.6667	5.9361	6	5.65949	300.2	5.45197	7.15123	-41.3546	-0.120436	-0.137757	-0.000146067	-2.9194e-06
MgO	17.5	6.37931	6.30258	5.58865	6.07828	6.00172	5.28678	6.07828	6.00139	5.28846	-20.789	-20.7375	-21.0558	-20.5881	-20.6344	-20.348	-20.99	-20.8407	-21.7608	5.94599	6	5.66645	5.94537	6	5.662	5.9466	6	5.67087	350.2	5.58578	7.35195	-41.5781	0.103007	-0.118727	-0.000107915	-1.84892e-06
MgO	20	6.55331	6.48646	5.70765	6.25228	6.18552	5.4061	6.25228	6.18534	5.40715	-20.6947	-20.7375	-20.4374	-20.5912	-20.6344	-20.3314	-20.7982	-20.8407	-20.5432	5.95269	6	5.66837	5.95305	6	5.67055	5.95232	6	5.66618	400.2	5.7017	7.52583	-41.3894	-0.0856648	-0.103422	-8.22593e-05	-1.23327e-06
MgO	22.5	6.70685	6.64748	5.81333	6.40582	6.34643	5.51239	6.40582	6.34646	5.51222	-20.6978	-20.7375	-20.4266	-20.5931	-20.6344	-20.3115	-20.8025	-20.8407	-20.5417	5.958	6	5.67136	5.95857	6	5.67584	5.95744	6	5.66687	450.2	5.80396	7.67922	-41.3956	-0.0794626	-0.0919494	-6.5012e-05	-8.66441e-07
MgO	25	6.84414	6.79082	5.90688	6.54311	6.48981	5.60567	6.54311	6.48976	5.60602	-20.7801	-20.7375	-21.1064	-20.6019	-20.6344	-20.353	-20.9584	-20.8407	-21.8591	5.96225	6	5.67327	5.96162	6	5.66769	5.96288	6	5.67885	500.2	5.89544	7.81643	-41.5603	0.0852205	-0.0830873	-5.28739e-05	-6.34233e-07
MgO	27.5	6.96825	6.91989	5.99103	6.66722	6.61885	5.69004	6.66722	6.61886	5.68995	-20.7067	-20.7375	-20.4451	-20.6037	-20.6344	-20.3427	-20.8098	-20.8407	-20.5474	5.96553	6	5.67294	5.9657	6	5.67459	5.96536	6	5.67129	550.2	5.97819	7.94056	-41.4134	-0.0616394	-0.0752698	-4.35462e-05	-4.74877e-07
MgO	30	7.08157	7.03735	6.06751	6.78054	6.73632	5.76646	6.78054	6.73632	5.76649	-20.707	-20.7375	-20.422	-20.6022	-20.6344	-20.302	-20.8118	-20.8407	-20.542	5.96849	6	5.67458	5.96899	6	5.67966	5.968	6	5.66949	600.2	6.05374	8.05389	-41.414	-0.0610959	-0.0690003	-3.65936e-05	-3.65814e-07
La2O3	2.5	3.60293	2.94939	3.49388	3.20493	2.549	3.09656	3.38112	2.72916	3.27161	-11.8556	-12.4231	-11.6936	-35.7144	-37.3259	-35.2577	4.047	4.02395	4.05361	7.77794	8.40899	7.59782	5.54585	6	5.41713	9.2657	10	9.05511	50.2	3.89856	4.82111	-59.2779	-13.9573	-1.18084	-0.00748748	-0.000894918
La2O3	5	4.50515	4.21484	4.19312	4.10721	3.81531	3.79685	4.2833	3.99405	3.97016	-12.415	-12.4555	-12.3725	-36.7363	-37.3259	-36.121	3.79914	4.02395	3.56162	8.08638	8.40585	7.75051	5.76727	6	5.52443	9.63245	10	9.24411	100.2	4.49889	5.7216	-62.0752	-11.1601	-0.619513	-0.00196803	-0.000117846
La2O3	7.5	5.03317	4.84716	4.57522	4.63522	4.44932	4.17707	4.81132	4.62524	4.35351	-12.3213	-12.52	-11.9498	-36.8989	-37.3259	-36.0996	4.06345	4.02395	4.13728	8.1943	8.39961	7.81028	5.84729	6	5.56146	9.75895	10	9.3083	150.2	4.85049	6.24901	-61.6067	-11.6285	-0.410165	-0.000869238	-3.47232e-05
La2O3	10	5.40821	5.27084	4.84147	5.01027	4.87252	4.44454	5.18637	5.04924	4.61894	-12.3633	-12.5016	-11.9919	-36.9753	-37.3259	-36.036	4.04465	4.02395	4.1004	8.24528	8.4014	7.82569	5.88652	6	5.58249	9.81779	10	9.32702	200.2	5.10008	6.62339	-61.8167	-11.4186	-0.308775	-0.000490939	-1.47135e-05
La2O3	12.5	5.69878	5.59004	5.04415	5.30084	5.19207	4.64633	5.47693	5.36821	4.82223	-12.4151	-12.5148	-12.0648	-37.1016	-37.3259	-36.3134	4.04258	4.02395	4.10806	8.2772	8.40012	7.84517	5.90887	6	5.58868	9.85608	10	9.35015	250.2	5.29372	6.91386	-62.0755	-11.1598	-0.248103	-0.000315643	-7.56937e-06
La2O3	15	5.93638	5.84636	5.20874	5.53844	5.44844	4.81069	5.71453	5.62449	4.98696	-12.4446	-12.517	-12.1306	-37.1437	-37.3259	-36.3521	4.02137	4.02395	4.0102	8.29759	8.39991	7.85339	5.92417	6	5.59488	9.87986	10	9.35843	300.2	5.45197	7.15123	-62.2232	-11.0121	-0.207272	-0.000219776	-4.3926e-06
La2O3	17.5	6.13723	6.06045	5.34683	5.73929	5.6625	4.94894	5.91538	5.83861	5.12495	-12.4429	-12.5157	-12.0666	-37.1516	-37.3259	-36.25	4.02956	4.02395	4.05859	8.31273	8.40003	7.86126	5.93597	6	5.60486	9.89725	10	9.36579	350.2	5.58578	7.35195	-62.2144	-11.0208	-0.177654	-0.000161476	-2.76659e-06
La2O3	20	6.31117	6.24426	5.46581	5.91323	5.84643	5.06725	6.08932	6.02234	5.24438	-12.4618	-12.52	-12.1126	-37.1933	-37.3259	-36.3953	4.02582	4.02395	4.03705	8.32341	8.39962	7.86586	5.94332	6	5.60241	9.91014	10	9.37121	400.2	5.7017	7.52583	-62.3091	-10.9262	-0.155695	-0.000123836	-1.85661e-06
La2O3	22.5	6.46455	6.40532	5.57005	6.06661	6.00745	5.17165	6.24271	6.18343	5.3485	-12.4696	-12.5185	-12.135	-37.2112	-37.3259	-36.4248	4.02473	4.02395	4.03008	8.33241	8.39976	7.87151	5.94994	6	5.60696	9.92072	10	9.3786	450.2	5.80396	7.67922	-62.3482	-10.8871	-0.13849	-9.7918e-05	-1.30499e-06
La2O3	25	6.60177	6.54864	5.66305	6.20383	6.15071	5.26508	6.37993	6.32679	5.44122	-12.4729	-12.5161	-12.1407	-37.2189	-37.3259	-36.3962	4.02441	4.02395	4.02792	8.33904	8.39999	7.87075	5.95483	6	5.60767	9.92852	10	9.3793	500.2	5.89544	7.81643	-62.3646	-10.8707	-0.124679	-7.93415e-05	-9.51718e-07
La2O3	27.5	6.72588	6.67776	5.74662	6.32794	6.27984	5.34845	6.50403	6.45589	5.52492	-12.4819	-12.517	-12.1821	-37.2255	-37.3258	-36.3691	4.01387	4.02388	3.92849	8.34399	8.3999	7.86687	5.95853	6	5.60441	9.9343	10	9.37387	550.2	5.97819	7.94056	-62.4094	-10.8258	-0.11343	-6.56235e-05	-7.15632e-07
La2O3	30	6.83925	6.79265	5.84678	6.44129	6.39472	5.44847	6.6173	6.57067	5.62512	-12.5196	-12.5273	-12.4423	-37.2361	-37.2984	-36.6087	3.95812	3.98754	3.66187	8.34356	8.39313	7.84427	5.9589	6	5.5897	9.93333	10	9.34669	600.2	6.05337	8.05328	-62.5979	-10.6374	-0.104295	-5.53118e-05	-5.52934e-07
NiO	2.5	3.83046	3.15198	3.72827	3.52943	2.83442	3.43152	3.52943	2.86688	3.42292	-19.8587	-20.2374	-19.7583	-19.7189	-20.1375	-19.613	-19.9986	-20.33	-19.9065	5.61525	6	5.51318	5.62234	6	5.52684	5.60816	6	5.49924	50.2	3.89856	4.82111	-39.7175	-0.797267	-0.791185	-0.00501677	-0.000599614
NiO	5	4.73349	4.44105	4.42369	4.43246	4.14023	4.12245	4.43246	4.13982	4.12287	-20.0541	-20.2337	-19.8672	-19.9395	-20.1375	-19.7332	-20.1687	-20.33	-20.001	5.80826	6	5.6087	5.8121	6	5.61635	5.80442	6	5.60106	100.2	4.49889	5.7216	-40.1082	-0.406524	-0.400282	-0.00127159	-7.61433e-05
NiO	7.5	5.25995	5.07343	4.80296	4.95892	4.77316	4.5005	4.95892	4.77163	4.50335	-20.1255	-20.2336	-19.924	-20.0286	-20.1375	-19.8247	-20.2224	-20.33	-20.0227	5.87195	6	5.63326	5.87292	6	5.63483	5.87099	6	5.6317	150.2	4.85049	6.24901	-40.251	-0.26375	-0.267983	-0.00056792	-2.26865e-05
NiO	10	5.6353	5.49737	5.07003	5.33427	5.19637	4.7689	5.33427	5.1963	4.76909	-20.1529	-20.2338	-19.9367	-20.0592	-20.1375	-19.8496	-20.2466	-20.33	-20.0237	5.90443	6	5.64877	5.90198	6	5.63968	5.90689	6	5.65787	200.2	5.10008	6.62339	-40.3058	-0.208908	-0.201328	-0.000320103	-9.5935e-06
NiO	12.5	5.92585	5.81697	5.27173	5.62482	5.51622	4.9697	5.62482	5.51565	4.97169	-20.1699	-20.2337	-19.9459	-20.0729	-20.1375	-19.8453	-20.2669	-20.33	-20.046	5.92332	6	5.65422	5.92376	6	5.6554	5.92288	6	5.65304	250.2	5.29372	6.91386	-40.3398	-0.174974	-0.16123	-0.00020512	-4.91896e-06
NiO	15	6.16333	6.07341	5.43522	5.8623	5.77218	5.13503	5.8623	5.77257	5.13334	-20.1762	-20.2338	-19.9257	-20.0763	-20.1375	-19.8105	-20.2761	-20.33	-20.0413	5.93606	6	5.65813	5.93697	6	5.66365	5.93515	6	5.65258	300.2	5.45197	7.15123	-40.3524	-0.162385	-0.134418	-0.000142527	-2.84864e-06
NiO	17.5	6.36411	6.28734	5.57369	6.06308	5.98624	5.27304	6.06308	5.98639	5.27228	-20.1822	-20.2338	-19.9156	-20.0813	-20.1375	-19.7906	-20.2832	-20.33	-20.0408	5.94525	6	5.66207	5.94646	6	5.66981	5.94404	6	5.65432	350.2	5.58578	7.35195	-40.3645	-0.150275	-0.115261	-0.000104765	-1.79495e-06
NiO	20	6.5381	6.4711	5.69333	6.23707	6.17005	5.39242	6.23707	6.17009	5.39218	-20.2301	-20.2338	-20.2077	-20.1	-20.1375	-19.8752	-20.3601	-20.33	-20.5405	5.95205	6	5.66458	5.9517	6	5.66227	5.95239	6	5.66688	400.2	5.7017	7.52583	-40.4601	-0.0546497	-0.1011	-8.04124e-05	-1.20558e-06
NiO	22.5	6.69144	6.63225	5.79666	6.39041	6.33122	5.49562	6.39041	6.33122	5.49563	-20.1997	-20.2338	-19.9663	-20.1043	-20.1375	-19.8768	-20.2951	-20.33	-20.0558	5.95732	6	5.66503	5.95736	6	5.6653	5.95729	6	5.66477	450.2	5.80396	7.67922	-40.3994	-0.115372	-0.0897365	-6.34474e-05	-8.45589e-07
NiO	25	6.82874	6.77555	5.89046	6.52771	6.47457	5.58906	6.52771	6.47447	5.58981	-20.2047	-20.2338	-19.9814	-20.1076	-20.1375	-19.878	-20.3017	-20.33	-20.0846	5.96163	6	5.66711	5.96136	6	5.66448	5.9619	6	5.66973	500.2	5.89544	7.81643	-40.4093	-0.105419	-0.0807863	-5.14096e-05	-6.16669e-07
NiO	27.5	6.95297	6.90466	5.97528	6.65194	6.60362	5.67434	6.65194	6.60364	5.67416	-20.206	-20.2338	-19.9699	-20.1105	-20.1375	-19.8806	-20.3015	-20.33	-20.0592	5.96513	6	5.66873	5.96494	6	5.66707	5.96531	6	5.6704	550.2	5.97819	7.94056	-40.412	-0.10277	-0.0734496	-4.24932e-05	-4.63393e-07
NiO	30	7.06629	7.02207	6.05216	6.76526	6.72105	5.75105	6.76526	6.72103	5.75121	-20.208	-20.2338	-19.9679	-20.1123	-20.1375	-19.8766	-20.3038	-20.33	-20.0592	5.96801	6	5.66952	5.96807	6	5.67013	5.96795	6	5.66892	600.2	6.05374	8.05389	-40.4161	-0.0986906	-0.0673377	-3.57118e-05	-3.56999e-07
ZnO	2.5	3.74147	3.07518	3.63599	3.44044	2.77597	3.33445	3.44044	2.77232	3.33546	-21.7419	-19.6157	-22.3264	-19.2664	-19.5278	-19.1941	-24.2174	-19.7042	-25.4515	3.76532	4	3.70081	3.75952	4	3.69306	3.77113	4	3.70855	50.2	3.89856	4.82111	-43.4838	4.25171	-0.866211	-0.0054925	-0.000656474
ZnO	5	4.64312	4.35263	4.33129	4.34209	4.05169	4.03015	4.34209	4.0515	4.03036	-19.4819	-19.616	-19.341	-19.3983	-19.5278	-19.2621	-19.5655	-19.7042	-19.4199	3.88073	4	3.75544	3.88082	4	3.75557	3.88064	4	3.75532	100.2	4.49889	5.7216	-38.9638	-0.268307	-0.38886	-0.00123531	-7.39706e-05
ZnO	7.5	5.17187	4.98524	4.71508	4.87084	4.68403	4.41439	4.87084	4.68439	4.41372	-19.525	-19.6161	-19.3554	-19.4373	-19.5278	-19.2687	-19.6128	-19.7042	-19.4422	3.92125	4	3.77456	3.92183	4	3.77639	3.92067	4	3.77273	150.2	4.85049	6.24901	-39.05	-0.18205	-0.259987	-0.000550975	-2.20096e-05
ZnO	10	5.54653	5.40919	4.97969	5.2455	5.10821	4.67853	5.2455	5.1081	4.6788	-19.5589	-19.616	-19.4053	-19.4643	-19.5278	-19.2936	-19.6534	-19.7042	-19.5169	3.9406	4	3.78091	3.94059	4	3.7808	3.94061	4	3.78102	200.2	5.10008	6.62339	-39.1178	-0.114302	-0.195393	-0.000310668	-9.31072e-06
ZnO	12.5	5.83727	5.72855	5.18258	5.53624	5.42747	4.88173	5.53624	5.42757	4.88137	-19.5617	-19.616	-19.3704	-19.4768	-19.5278	-19.2976	-19.6465	-19.7042	-19.4434	3.95251	4	3.78556	3.9524	4	3.78514	3.95262	4	3.78599	250.2	5.29372	6.91386	-39.1233	-0.108766	-0.156368	-0.000198935	-4.77062e-06
ZnO	15	6.07487	5.98493	5.34684	5.77384	5.6839	5.04584	5.77384	5.68391	5.04578	-19.5798	-19.616	-19.4222	-19.4851	-19.5278	-19.2996	-19.6744	-19.7042	-19.5448	3.96048	4	3.78871	3.96029	4	3.78775	3.96066	4	3.78967	300.2	5.45197	7.15123	-39.1596	-0.0725141	-0.130445	-0.000138314	-2.76444e-06
ZnO	17.5	6.27568	6.19899	5.48484	5.97465	5.89796	5.18379	5.97465	5.89795	5.18383	-19.5773	-19.616	-19.3769	-19.491	-19.5278	-19.3005	-19.6636	-19.7042	-19.4533	3.96601	4	3.79	3.96588	4	3.78918	3.96614	4	3.79082	350.2	5.58578	7.35195	-39.1547	-0.0774125	-0.111807	-0.000101625	-1.74115e-06
ZnO	20	6.44947	6.3786	5.62719	6.14844	6.07753	5.3264	6.14844	6.07759	5.32605	-19.5886	-19.616	-19.3963	-19.4986	-19.5278	-19.3022	-19.6786	-19.7042	-19.4904	3.97316	4	3.79253	3.973	4	3.79139	3.97332	4	3.79366	400.2	5.7013	7.52515	-39.1772	-0.054877	-0.0978941	-7.79345e-05	-1.16919e-06
ZnO	22.5	6.60288	6.53902	5.73879	6.30185	6.23795	5.43803	6.30185	6.23802	5.43762	-19.5964	-19.616	-19.3996	-19.5057	-19.5278	-19.3037	-19.6872	-19.7042	-19.4954	3.97991	4	3.79474	3.97974	4	3.79341	3.98008	4	3.79607	450.2	5.80343	7.67835	-39.1929	-0.0392	-0.0870566	-6.16272e-05	-8.21978e-07
ZnO	25	6.74012	6.68189	5.83862	6.43909	6.38082	5.53789	6.43909	6.38089	5.53743	-19.6043	-19.616	-19.4028	-19.5128	-19.5278	-19.3051	-19.6958	-19.7042	-19.5004	3.98666	4	3.79696	3.98648	4	3.79544	3.98684	4	3.79849	500.2	5.89479	7.81539	-39.2086	-0.023523	-0.0783858	-4.99559e-05	-5.99784e-07
ZnO	27.5	6.86426	6.81068	5.92893	6.56323	6.50961	5.62822	6.56323	6.50967	5.62771	-19.6121	-19.616	-19.406	-19.5199	-19.5278	-19.3066	-19.7043	-19.7042	-19.5053	3.99341	4	3.79918	3.99322	4	3.79746	3.9936	4	3.80091	550.2	5.97744	7.93935	-39.2242	-0.007846	-0.0712909	-4.13158e-05	-4.51026e-07
ZnO	30	6.97759	6.92791	6.01137	6.67656	6.62684	5.71069	6.67656	6.6269	5.71014	-19.62	-19.616	-19.4093	-19.527	-19.5278	-19.3081	-19.7129	-19.7042	-19.5103	4.00016	4	3.8014	3.99996	4	3.79948	4.00036	4	3.80332	600.2	6.05289	8.05253	-39.2399	0.007831	-0.0653781	-3.47409e-05	-3.47698e-07
